# Supplementary material for: CO2 promoted photoredox/Ni-catalyzed semi-reduction of alkynes with H2O
Source: Royal Society of Chemistry journal article supplement (doi:10.1039/d3gc03290f), 2023-01-01
Supplement: d3gc03290f1.pdf [file d3gc03290f1.pdf]

Supporting Information

*For*

**CO<sub>2</sub> Promoted Photoredox/Ni-Catalyzed Semi-reduction of Alkynes with H<sub>2</sub>O**

Shenhao Chen<sup>a</sup>, Chanjuan Xi<sup>\*a,b</sup>

<sup>a</sup>MOE Key Laboratory of Bioorganic Phosphorus Chemistry & Chemical Biology,  
Department of Chemistry, Tsinghua University, Beijing 100084, China

<sup>b</sup>State Key Laboratory of Elemento-Organic Chemistry, Nankai University, Tianjin  
300071, China

Email: cjxi@tsinghua.edu.cn

**List of the Contents**

|                                                                                                                            |     |
|----------------------------------------------------------------------------------------------------------------------------|-----|
| 1. General Information.....                                                                                                | S2  |
| 2. General Procedures for Synthesis of Substrates 1.....                                                                   | S4  |
| 3. General Procedures for Synthesis of Products 2.....                                                                     | S6  |
| 4. General Procedures for Mechanism Studies.....                                                                           | S7  |
| 5. Spectral Data for Synthesized Substrates.....                                                                           | S10 |
| 6. Spectral Data for All Products.....                                                                                     | S12 |
| 7. References .....                                                                                                        | S18 |
| 8. Copies of <sup>1</sup> H, <sup>13</sup> C{ <sup>1</sup> H}, <sup>19</sup> F NMR Spectra for Synthesized Compounds ..... | S19 |

## 1. General Information

Unless otherwise noted, all the reactions were carried out in oven-dried sealed tube with Teflon-lined-septum under CO<sub>2</sub> atmosphere. Materials were obtained from commercial sources and used as received, or synthesized according to previous literatures. Super dry acetonitrile with molecular sieves was use in the reaction. <sup>1</sup>H NMR, <sup>13</sup>C NMR, and <sup>19</sup>F NMR spectra were recorded on 400 MHz at ambient temperature with CDCl<sub>3</sub> as the solvent. Chemical shifts ( $\delta$ ) were given in ppm, referenced to the residual proton resonance of CDCl<sub>3</sub> (7.26), to the carbon resonance of CDCl<sub>3</sub> (77.16). Coupling constants (*J*) were given in Hertz (Hz). The term m, q, t, d, and s referred to multiplet, quartet, triplet, doublet, and singlet. The reaction progress was monitored by GC-MS if applicable. Column chromatography was performed with silica gel (200-300 meshes). Thin layer chromatography (TLC) was visualized using UV light. HRMS analysis was performed on a Shimadzu LCMS-IT/TOF spectrometer.

The photoreactor used in this research was built by our group, which was made up of 4 blue LED bulbs (30 W for each) with 3 cooler fans to keep room temperature. Spectral distribution: 425 nm. In the reaction, each Schlenk tube is mainly irradiated by one of the light bulbs. The approximate distance of the tube to the closest light bulb is 2 cm. A magnetic stirrer is placed under the photoreactor to keep the reaction being stirred.

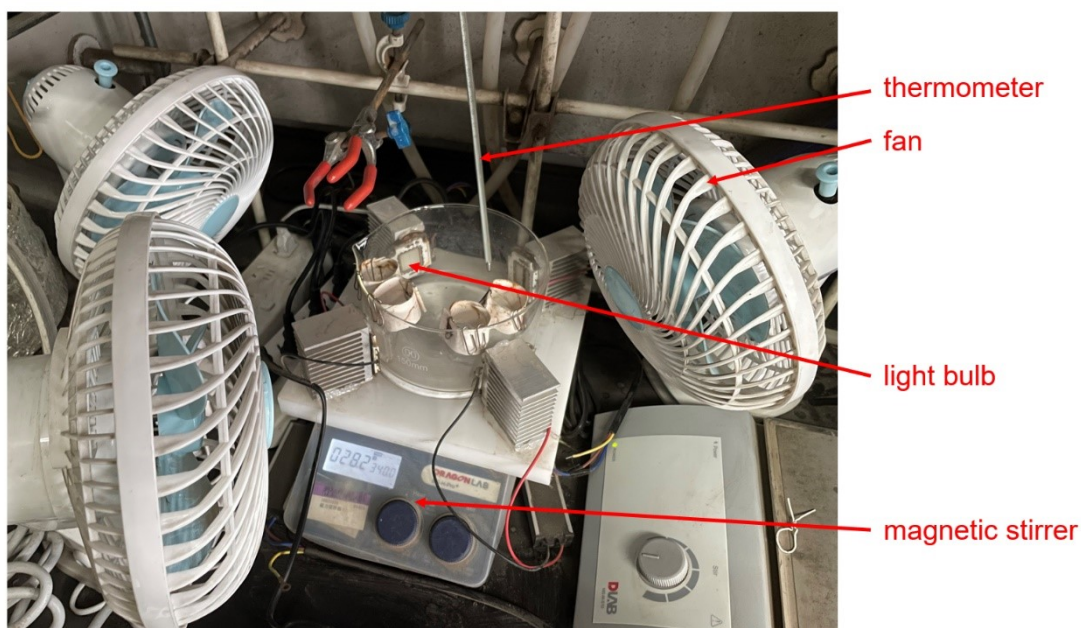

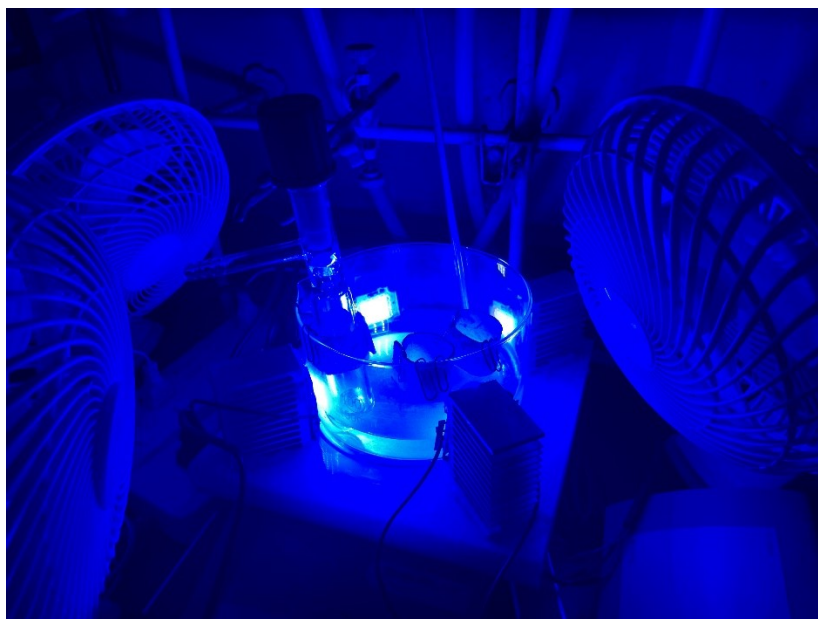

**Figure S1** Photos of the photoreactor

## 2. General Procedures for Synthesis of Substrates 1:

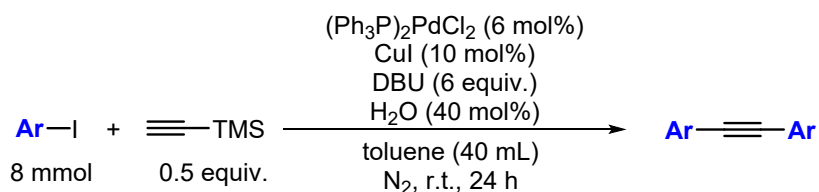

*General procedures for synthesis of substrates 2c, 2f:* A sealed tube equipped with a stirrer bar was charged with aryl iodide (8 mmol, 1.0 equiv.),  $(\text{PPh}_3)_2\text{PdCl}_2$  (0.168 g, 6.0 mol%), CuI (0.152 mg, 10 mol%), then degassed and refilled with  $\text{N}_2$  for 3 times. Subsequently, toluene (40 mL), trimethylsilylacetylene (0.393 g, 0.5 equiv.), DBU (7.307 g, 6.0 equiv.),  $\text{H}_2\text{O}$  (58.0 mg, 40 mol%) were added under  $\text{N}_2$ . The reaction mixture was stirred at room temperature for 24 hours. After removing toluene in vacuo, the mixture was quenched with 50 mL  $\text{H}_2\text{O}$  and the aqueous layer was extracted with 30 mL trichloromethane ( $\text{CHCl}_3$ ) for three times. The combined organic layer was successively washed with 20 mL 10% HCl for 3 times, and 20 mL brine for 1 time, then dried by  $\text{Na}_2\text{SO}_4$  and concentrated in vacuo. The residue was purified by chromatography on silica gel to give products **2c** and **2f**, which were identified by  $^1\text{H}$  and  $^{13}\text{C}$  NMR.

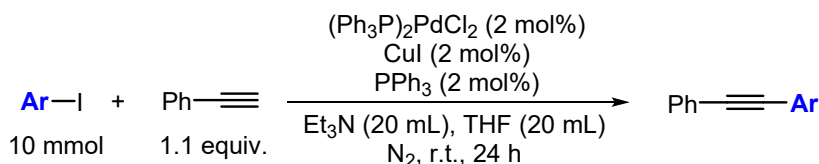

*General procedures for synthesis of substrates 2d, 2j:* A sealed tube equipped with a stirrer bar was charged with aryl iodide (10 mmol, 1.0 equiv.),  $(\text{PPh}_3)_2\text{PdCl}_2$  (140.4 mg, 2.0 mol%), CuI (38.1 mg, 2 mol%),  $\text{PPh}_3$  (52.5 mg, 2 mol%), then degassed and refilled with  $\text{N}_2$  for 3 times. Subsequently, dry THF (20 mL),  $\text{Et}_3\text{N}$  (20 mL) and phenylacetylene (1.123 g, 1.1 equiv.) were added under  $\text{N}_2$ . The reaction mixture was stirred at room temperature for 36 hours, then quenched with 50 mL  $\text{H}_2\text{O}$ , and the aqueous layer was extracted with 30 mL trichloromethane ( $\text{CHCl}_3$ ) for three times. The combined organic layer was dried by  $\text{Na}_2\text{SO}_4$  and concentrated in vacuo. The residue was purified by chromatography on silica gel to give products **2d** and **2j**, which were identified by  $^1\text{H}$  and  $^{13}\text{C}$  NMR.

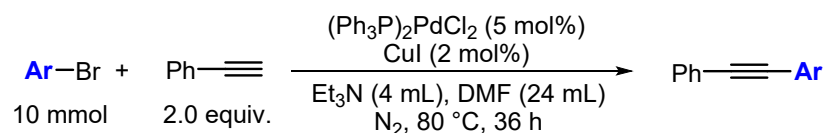

*General procedures for synthesis of substrate 2h:* A sealed tube equipped with a stirrer bar was charged with aryl bromine (10 mmol, 1.0 equiv.), (PPh<sub>3</sub>)<sub>2</sub>PdCl<sub>2</sub> (351.0 mg, 5.0 mol%), CuI (38.1 mg, 2 mol%), then degassed and refilled with N<sub>2</sub> for 3 times. Subsequently, dry DMF (24 mL), Et<sub>3</sub>N (4 mL) and phenylacetylene (2.042 g, 2.0 equiv.) were added under N<sub>2</sub>. The reaction mixture was stirred at 80 °C for 36 hours, then quenched with 50 mL H<sub>2</sub>O, and the aqueous layer was extracted with 30 mL trichloromethane (CHCl<sub>3</sub>) for three times. The combined organic layer was dried by Na<sub>2</sub>SO<sub>4</sub> and concentrated in vacuo. The residue was purified by chromatography on silica gel to give products **2h**, which was identified by <sup>1</sup>H and <sup>13</sup>C NMR.

### 3. General Procedures for Synthesis of Products 2:

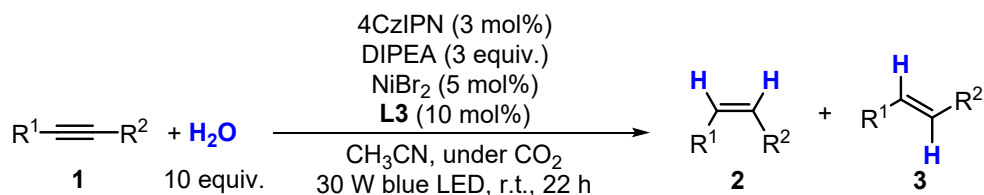

*General procedures for synthesis of products 2a-2p (internal alkenes):* A sealed tube equipped with a stirrer bar was charged with 4CzIPN (4.7 mg, 3.0 mol%), 4,4'-*tert*-butyl-2,2'-bipyridine **L3** (5.4 mg, 10 mol%), NiBr<sub>2</sub> (from the glove box, 2.2 mg, 5 mol%), then degassed and refilled with CO<sub>2</sub> for 3 times. After that, anhydrous CH<sub>3</sub>CN (3 mL) was added under CO<sub>2</sub>. The mixture was bubbled with CO<sub>2</sub> for 5 minutes, then DIPEA (25.8 mg, 1.0 equiv.), H<sub>2</sub>O (36.0 mg, 10 equiv.) and alkyne **1** (0.2 mmol) were added under CO<sub>2</sub>. The reaction mixture was irradiated by 30 W blue LEDs at room temperature for 22 hours, then cooled down to 10 °C and irradiated for another 30 minutes. The reaction was quenched with 10 mL H<sub>2</sub>O and the aqueous layer was extracted with 6 mL dichloromethane (CH<sub>2</sub>Cl<sub>2</sub>) for three times. The combined organic layer was dried by Na<sub>2</sub>SO<sub>4</sub> and concentrated in vacuo. The residue was purified by chromatography on silica gel to give products **2a-2q**, which were identified by <sup>1</sup>H, <sup>13</sup>C, and <sup>19</sup>F NMR.

*General procedures for synthesis of products 2q-2s (terminal alkenes):* A sealed tube equipped with a stirrer bar was charged with 4CzIPN (4.7 mg, 3.0 mol%), 4,4'-*tert*-butyl-2,2'-bipyridine **L3** (5.4 mg, 10 mol%), NiBr<sub>2</sub> (from the glove box, 2.2 mg, 5 mol%), then degassed and refilled with CO<sub>2</sub> for 3 times. After that, anhydrous CH<sub>3</sub>CN (3 mL) was added under CO<sub>2</sub>. The mixture was bubbled with CO<sub>2</sub> for 5 minutes, then DIPEA (25.8 mg, 1.0 equiv.), H<sub>2</sub>O (36.0 mg, 10 equiv.) and alkyne **1** (0.2 mmol) were added under CO<sub>2</sub>. The reaction mixture was irradiated by 30 W blue LEDs at room temperature for 22 hours, then quenched with 10 mL H<sub>2</sub>O. The aqueous layer was extracted with 6 mL dichloromethane (CH<sub>2</sub>Cl<sub>2</sub>) for three times. The combined organic layer was dried by Na<sub>2</sub>SO<sub>4</sub> and concentrated in vacuo. The residue was purified by chromatography on silica gel to give products **2q-2s** which were identified by <sup>1</sup>H and <sup>13</sup>C NMR.

## 4. General Procedures for Mechanism Studies

### 4.1 Deuterium-labelled experiments

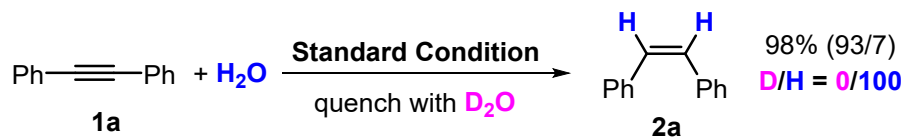

A sealed tube equipped with a stirrer bar was charged with 4CzIPN (4.7 mg, 3.0 mol%), 4,4'-di-*tert*-butyl-2,2'-bipyridine **L3** (5.4 mg, 10 mol%), NiBr<sub>2</sub> (from the glove box, 2.2 mg, 5 mol%), then degassed and refilled with CO<sub>2</sub> for 3 times. After that, anhydrous CH<sub>3</sub>CN (3 mL) was added under CO<sub>2</sub>. The mixture was bubbled with CO<sub>2</sub> for 5 minutes, then DIPEA (25.8 mg, 1.0 equiv.), H<sub>2</sub>O (36.0 mg, 10 equiv.) and alkyne **1a** (0.2 mmol) were added under CO<sub>2</sub>. The reaction mixture was irradiated by 30 W blue LEDs at room temperature for 22 hours, then cooled down to 10 °C and irradiated for another 30 minutes. The reaction was quenched with 10 mL D<sub>2</sub>O and the aqueous layer was extracted with 6 mL dichloromethane (CH<sub>2</sub>Cl<sub>2</sub>) for three times. The combined organic layer was dried by Na<sub>2</sub>SO<sub>4</sub> and concentrated in vacuo. The residue was tested by <sup>1</sup>H NMR to determine the deuterium ratio.

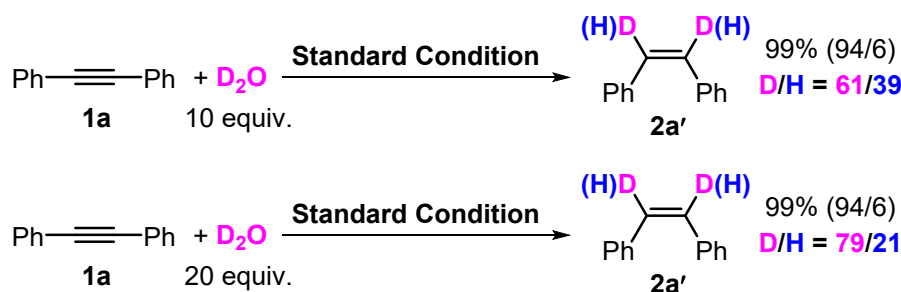

A sealed tube equipped with a stirrer bar was charged with 4CzIPN (4.7 mg, 3.0 mol%), 4,4'-di-*tert*-butyl-2,2'-bipyridine **L3** (5.4 mg, 10 mol%), NiBr<sub>2</sub> (from the glove box, 2.2 mg, 5 mol%), then degassed and refilled with CO<sub>2</sub> for 3 times. After that, anhydrous CH<sub>3</sub>CN (3 mL) was added under CO<sub>2</sub>. The mixture was bubbled with CO<sub>2</sub> for 5 minutes, then DIPEA (25.8 mg, 1.0 equiv.), D<sub>2</sub>O (36.0 mg / 72.0 mg, 10 equiv. / 20 equiv.) and alkyne **1a** (0.2 mmol) were added under CO<sub>2</sub>. The reaction mixture was irradiated by 30 W blue LEDs at room temperature for 22 hours, then cooled down to 10 °C and irradiated for another 30 minutes. The reaction was quenched with 10 mL H<sub>2</sub>O and the aqueous layer was extracted with 6 mL dichloromethane (CH<sub>2</sub>Cl<sub>2</sub>) for

three times. The combined organic layer was dried by Na<sub>2</sub>SO<sub>4</sub> and concentrated in vacuo. The residue was tested by <sup>1</sup>H NMR to determine the deuterium ratio.

#### 4.2 Isomerization experiments

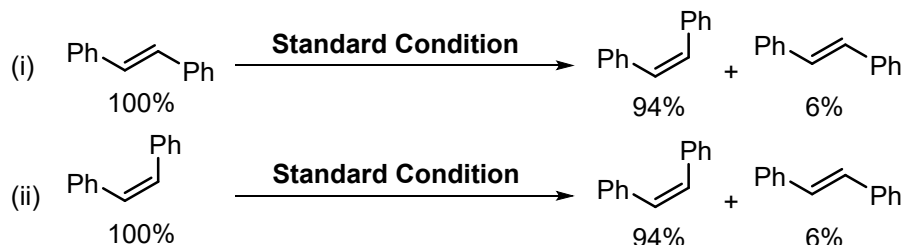

A sealed tube equipped with a stirrer bar was charged with 4CzIPN (4.7 mg, 3.0 mol%), 4,4'-di-*tert*-butyl-2,2'-bipyridine **L3** (5.4 mg, 10 mol%), NiBr<sub>2</sub> (from the glove box, 2.2 mg, 5 mol%), then degassed and refilled with CO<sub>2</sub> for 3 times. After that, anhydrous CH<sub>3</sub>CN (3 mL) was added under CO<sub>2</sub>. The mixture was bubbled with CO<sub>2</sub> for 5 minutes, then DIPEA (25.8 mg, 1.0 equiv.), H<sub>2</sub>O (36.0 mg, 10 equiv.) and alkene **2a** or **3a** (0.2 mmol) were added under CO<sub>2</sub>. The reaction mixture was irradiated by 30 W blue LEDs at room temperature for 22 hours, then quenched with 10 mL H<sub>2</sub>O. The aqueous layer was extracted with 6 mL dichloromethane (CH<sub>2</sub>Cl<sub>2</sub>) for three times. The combined organic layer was dried by Na<sub>2</sub>SO<sub>4</sub> and concentrated in vacuo. The residue was tested by <sup>1</sup>H NMR to determine the *Z/E* ratio.

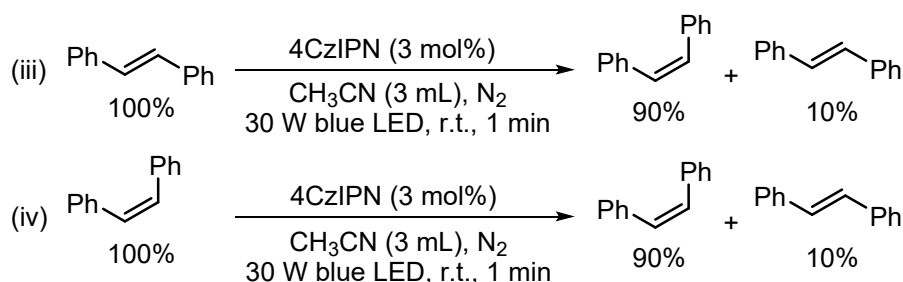

A sealed tube equipped with a stirrer bar was charged with 4CzIPN (4.7 mg, 3.0 mol%), then degassed and refilled with N<sub>2</sub> for 3 times. After that, anhydrous CH<sub>3</sub>CN (3 mL) was added under N<sub>2</sub>. Subsequently, alkene **2a** or **3a** (0.2 mmol) was added under N<sub>2</sub>. The reaction mixture was irradiated by 30 W blue LEDs at room temperature for 1 minute, then concentrated in vacuo. The residue was tested by <sup>1</sup>H NMR to determine the *Z/E* ratio.



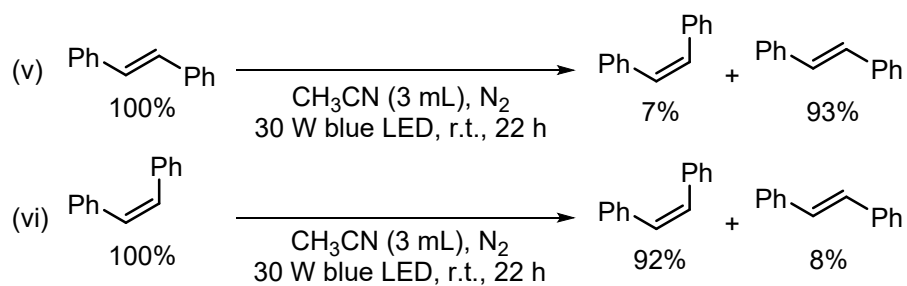

A sealed tube equipped with a stirrer bar was degassed and refilled with  $N_2$  for 3 times. After that, anhydrous  $CH_3CN$  (3 mL) was added under  $N_2$ . Subsequently, alkene **2a** or **3a** (0.2 mmol) was added under  $N_2$ . The reaction mixture was irradiated by 30 W blue LEDs at room temperature for 22 hours, then concentrated in vacuo. The residue was tested by  $^1H$  NMR to determine the *Z/E* ratio.

## 5. Spectra Data for Synthesized Substrates

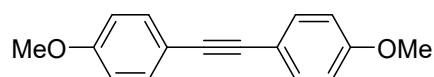

**1,2-Bis(4-methoxyphenyl)ethyne (1c):**  $^1\text{H}$  NMR (400 MHz, CHLOROFORM-D)  $\delta$  7.48 – 7.41 (m, 4H), 6.90 – 6.83 (m, 4H), 3.81 (s, 6H).  $^{13}\text{C}$  NMR (101 MHz, CHLOROFORM-D)  $\delta$  159.5, 133.0, 115.8, 114.1, 88.1, 55.4. The spectroscopic data corresponds to the reported data.<sup>1</sup>

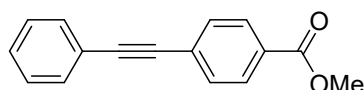

**Methyl 4-(phenylethynyl)benzoate (1d):**  $^1\text{H}$  NMR (400 MHz, CHLOROFORM-D)  $\delta$  8.01 (d,  $J$  = 8.4 Hz, 2H), 7.60 – 7.51 (m, 4H), 7.38 – 7.32 (m, 3H), 3.90 (s, 3H).  $^{13}\text{C}$  NMR (101 MHz, CHLOROFORM-D)  $\delta$  166.5, 131.8, 131.5, 129.6, 129.5, 128.8, 128.5, 128.0, 122.8, 92.4, 88.7, 52.2. The spectroscopic data corresponds to the reported data.<sup>2</sup>

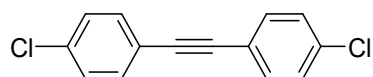

**1,2-Bis(4-chlorophenyl)ethyne (1f):**  $^1\text{H}$  NMR (400 MHz, CHLOROFORM-D)  $\delta$  7.44 (d,  $J$  = 8.4 Hz, 4H), 7.32 (d,  $J$  = 8.4 Hz, 4H).  $^{13}\text{C}$  NMR (101 MHz, CHLOROFORM-D)  $\delta$  134.7, 133.0, 128.9, 121.6, 89.3. The spectroscopic data corresponds to the reported data.<sup>1</sup>

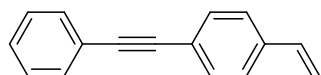

**1-(Phenylethynyl)-4-vinylbenzene (1h):**  $^1\text{H}$  NMR (400 MHz, CHLOROFORM-D)  $\delta$  7.57 – 7.52 (m, 2H), 7.50 (d,  $J$  = 8.2 Hz, 2H), 7.39 (d,  $J$  = 8.3 Hz, 2H), 7.37 – 7.32 (m, 3H), 6.72 (dd,  $J$  = 17.6, 10.9 Hz, 1H), 5.79 (d,  $J$  = 17.6 Hz, 1H), 5.30 (d,  $J$  = 10.9 Hz, 1H).  $^{13}\text{C}$  NMR (101 MHz, CHLOROFORM-D)  $\delta$  137.6, 136.4, 131.9, 131.7, 128.5,

128.4, 126.3, 123.4, 122.7, 114.9, 90.2, 89.6. The spectroscopic data corresponds to the reported data.<sup>3</sup>

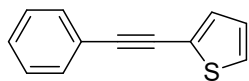

**2-(Phenylethynyl)thiophene (1j):** <sup>1</sup>H NMR (400 MHz, CHLOROFORM-D) δ 7.52 – 7.50 (m, 2H), 7.36 – 7.32 (m, 3H), 7.28 – 7.27 (m, 2H), 7.02 – 6.98 (m, 1H). <sup>13</sup>C NMR (101 MHz, CHLOROFORM-D) δ 132.6, 132.0, 131.5, 129.3, 128.5, 128.5, 127.4, 127.2, 123.4, 123.1, 93.2, 82.7. The spectroscopic data corresponds to the reported data.<sup>4</sup>

## 6. Spectral Data for All Products

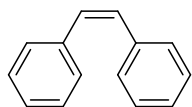

**(Z)-1,2-Diphenylethene (2a):** colorless liquid (33.5 mg, 99%, *Z/E*: 94/6). Eluent for the flash chromatography with silica gel: hexane.  $^1\text{H}$  NMR (400 MHz, CHLOROFORM-D)  $\delta$  7.27 – 7.20 (m, 10H), 6.62 (s, 2H).  $^{13}\text{C}$  NMR (101 MHz, CHLOROFORM-D)  $\delta$  137.4, 130.4, 129.0, 128.4, 127.2. The spectroscopic data corresponds to the reported data.<sup>5</sup>

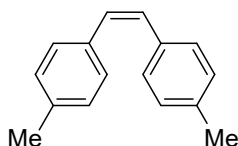

**(Z)-4,4'-Dimethylstilbene (2b):** colorless liquid (33.9 mg, 97%, *Z/E*: 84/16). Eluent for the flash chromatography with silica gel: hexane.  $^1\text{H}$  NMR (400 MHz, CHLOROFORM-D)  $\delta$  7.21 (d,  $J = 8.0$  Hz, 4H), 7.08 (d,  $J = 7.9$  Hz, 4H), 6.56 (s, 2H), 2.36 (s, 6H).  $^{13}\text{C}$  NMR (101 MHz, CHLOROFORM-D)  $\delta$  136.8, 134.7, 129.7, 129.0, 128.9, 21.4. The spectroscopic data corresponds to the reported data.<sup>5</sup>

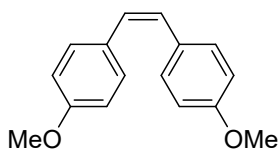

**(Z)-4,4'-Dimethoxystilbene (2c):** colorless liquid (25.2 mg, 99%, *Z/E*: 53/47). Eluent for the flash chromatography with silica gel: hexane / ethyl acetate (EA): 40/1.  $^1\text{H}$  NMR (400 MHz, CHLOROFORM-D)  $\delta$  7.24 – 7.18 (m, 4H), 6.80 – 6.75 (m, 4H), 6.45 (s, 2H), 3.79 (s, 6H).  $^{13}\text{C}$  NMR (101 MHz, CHLOROFORM-D)  $\delta$  158.6, 130.2, 130.1, 128.5, 113.7, 55.3. The spectroscopic data corresponds to the reported data.<sup>5</sup>

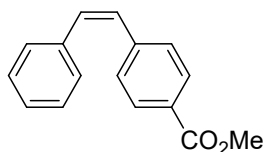

**(Z)-4-Carbomethoxystilbene (2d):** colorless liquid (40.2 mg, 98%, *Z/E*: 86/14). Eluent for the flash chromatography with silica gel: hexane/EA: 60/1. <sup>1</sup>H NMR (400 MHz, CHLOROFORM-D) δ 7.89 (d, *J* = 8.3 Hz, 2H), 7.30 (d, *J* = 8.3 Hz, 2H), 7.23 – 7.20 (m, 5H), 6.73 – 6.57 (m, 2H), 3.89 (s, 3H). <sup>13</sup>C NMR (101 MHz, CHLOROFORM-D) δ 167.0, 142.2, 136.8, 132.3, 129.6, 129.3, 129.0, 128.7, 128.4, 127.6, 52.1. The spectroscopic data corresponds to the reported data.<sup>5</sup>

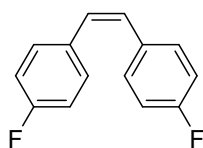

**(Z)-4,4'-Difluorostilbene (2e):** colorless liquid (40.3 mg, 97%, *Z/E*: 96/4). Eluent for the flash chromatography with silica gel: hexane. <sup>1</sup>H NMR (400 MHz, CHLOROFORM-D) δ 7.21 – 7.16 (m, 4H), 6.97 – 6.88 (m, 4H), 6.54 (s, 2H). <sup>13</sup>C NMR (101 MHz, CHLOROFORM-D) δ 162.0 (d, *J* = 247.4 Hz), 133.1 (d, *J* = 3.0 Hz), 130.6 (d, *J* = 7.1 Hz), 129.2, 115.4 (d, *J* = 22.2 Hz). <sup>19</sup>F NMR (376 MHz, CHLOROFORM-D) δ -114.4 – -114.3 (m). The spectroscopic data corresponds to the reported data.<sup>5</sup>

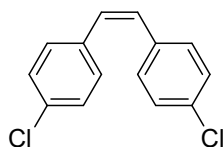

**(Z)-4,4'-Dichlorostilbene (2f):** colorless liquid (38.5 mg, 85%, *Z/E*: 91/9). Eluent for the flash chromatography with silica gel: hexane. <sup>1</sup>H NMR (400 MHz, CHLOROFORM-D) δ 7.21 – 7.19 (m, 4H), 7.15 – 7.13 (m, 4H), 6.55 (s, 2H). <sup>13</sup>C NMR (101 MHz, CHLOROFORM-D) δ 135.4, 133.1, 130.2, 129.7, 128.7. The spectroscopic data corresponds to the reported data.<sup>6</sup>

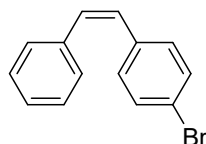

**(Z)-1-(4-Bromidephenyl)-2-phenylethene (2g):** colorless liquid (21.2 mg, 43%, *Z/E*: 95/5). Eluent for the flash chromatography with silica gel: hexane. <sup>1</sup>H NMR (400 MHz, CHLOROFORM-D) δ 7.36 – 7.32 (m, 2H), 7.24 – 7.21 (m, 5H), 7.12 – 7.09 (m, 2H),

6.64 (d,  $J = 12.4$  Hz, 1H), 6.50 (d,  $J = 12.4$  Hz, 1H).  $^{13}\text{C}$  NMR (101 MHz, CHLOROFORM-D)  $\delta$  137.0, 136.2, 131.5, 131.2, 130.7, 129.1, 128.9, 128.5, 127.2, 121.1. The spectroscopic data corresponds to the reported data.<sup>7</sup>

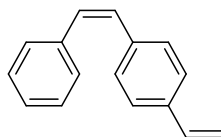

**1-Ethenyl-4-[(1Z)-2-phenylethenyl]benzene (2h):** colorless liquid (30.0 mg, 97%, *Z/E*: 75/25). Eluent for the flash chromatography with silica gel: hexane.  $^1\text{H}$  NMR (400 MHz, CHLOROFORM-D)  $\delta$  7.33 – 7.21 (m, 9H), 6.70 (dd,  $J = 17.6, 10.9$  Hz, 1H), 6.66 – 6.57 (m, 2H), 5.75 (d,  $J = 17.5$  Hz, 1H), 5.25 (d,  $J = 10.9$  Hz, 1H).  $^{13}\text{C}$  NMR (101 MHz, CHLOROFORM-D)  $\delta$  137.4, 136.9, 136.6, 136.5, 130.5, 130.0, 129.2, 129.0, 128.4, 127.3, 126.2, 113.8. The spectroscopic data corresponds to the reported data.<sup>8</sup>

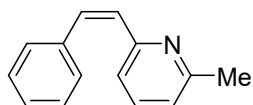

**2-Methyl-6-[(1Z)-2-phenylethenyl]pyridine (2i):** colorless liquid (34.4 mg, 88%, *Z/E*: 99/1). Eluent for the flash chromatography with silica gel: hexane/EA/Et<sub>3</sub>N: 100/3.3/1.  $^1\text{H}$  NMR (400 MHz, CHLOROFORM-D)  $\delta$  7.61 – 7.56 (m, 3H), 7.52 (t,  $J = 7.7$  Hz, 1H), 7.36 (t,  $J = 7.6$  Hz, 2H), 7.28 (t,  $J = 7.3$  Hz, 1H), 7.22 (d,  $J = 7.8$  Hz, 1H), 7.17 (d,  $J = 16.2$  Hz, 1H), 7.00 (d,  $J = 7.6$  Hz, 1H), 2.58 (s, 3H).  $^{13}\text{C}$  NMR (101 MHz, CHLOROFORM-D)  $\delta$  158.4, 155.2, 136.9, 136.7, 132.4, 128.8, 128.5, 128.2, 127.2, 121.8, 118.9, 24.8. The spectroscopic data corresponds to the reported data.<sup>9</sup>

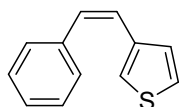

**1-Ethenyl-4-[(1Z)-2-phenylethenyl]benzene (2j):** colorless liquid (24.8 mg, 90%, *Z/E*: 74/26). Eluent for the flash chromatography with silica gel: hexane.  $^1\text{H}$  NMR (400 MHz, CHLOROFORM-D)  $\delta$  7.39 – 7.28 (m, 5H), 7.09 (d,  $J = 5.1$  Hz, 1H), 6.97 (d,  $J = 3.5$  Hz, 1H), 6.89 (dd,  $J = 5.0, 3.7$  Hz, 1H), 6.70 (d,  $J = 12.2$ , 1H), 6.58 (d,  $J = 12.1$ ,

1H). <sup>13</sup>C NMR (101 MHz, CHLOROFORM-D) δ 139.9, 137.5, 129.0, 129.0, 128.7, 128.3, 127.7, 126.6, 125.6, 123.5. The spectroscopic data corresponds to the reported data.<sup>5</sup>

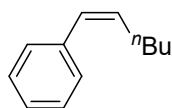

**(Z)-1-Hexen-1-ylbenzene (2k):** colorless liquid (27.2 mg, 85%, *Z/E*: 99/1). Eluent for the flash chromatography with silica gel: hexane. <sup>1</sup>H NMR (400 MHz, CHLOROFORM-D) δ 7.38 – 7.29 (m, 4H), 7.26 – 7.21 (m, 1H), 6.43 (d, *J* = 11.7 Hz, 1H), 5.69 (dt, *J* = 11.7, 7.3 Hz, 1H), 2.36 (qd, *J* = 7.4, 1.8 Hz, 2H), 1.49 – 1.35 (m, 4H), 0.93 (t, *J* = 7.2 Hz, 3H). <sup>13</sup>C NMR (101 MHz, CHLOROFORM-D) δ 138.0, 133.4, 128.9, 128.8, 128.2, 126.5, 32.3, 28.5, 22.6, 14.1. The spectroscopic data corresponds to the reported data.<sup>10</sup>

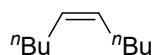

**(Z)-5-Decene (2l):** colorless liquid (3.4 mg, 12%, *Z/E*: 99/1). Eluent for the flash chromatography with silica gel: hexane. <sup>1</sup>H NMR (400 MHz, CHLOROFORM-D) δ 5.35 – 5.33 (m, 2H), 2.04 – 1.99 (m, 4H), 1.33 – 1.29 (m, 8H), 0.90 – 0.87 (m, 6H). <sup>13</sup>C NMR (101 MHz, CHLOROFORM-D) δ 130.0, 32.1, 27.0, 22.5, 14.1. The spectroscopic data corresponds to the reported data.<sup>11</sup>

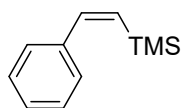

**(Z)-β-(Trimethylsilyl)styrene (2m):** colorless liquid (24.9 mg, 86%, *Z/E*: 82/18). Eluent for the flash chromatography with silica gel: hexane. <sup>1</sup>H NMR (400 MHz, CHLOROFORM-D) δ 7.37 (d, *J* = 15.1 Hz, 1H), 7.34 – 7.23 (m, 5H), 5.83 (d, *J* = 15.1 Hz, 1H), 0.05 (s, 9H). <sup>13</sup>C NMR (101 MHz, CHLOROFORM-D) δ 146.7, 140.3, 133.0, 128.3, 128.0, 127.5, 0.3. The spectroscopic data corresponds to the reported data.<sup>12</sup>

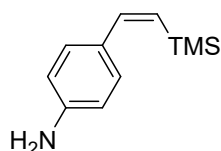

**4-[(Z)-2-(Trimethylsilyl)ethenyl]benzenamine (2n):** yellow liquid (17.2 mg, 75%, *Z/E*: 60/40). Eluent for the flash chromatography with silica gel: hexane/EA = 15/1. <sup>1</sup>H NMR (400 MHz, CHLOROFORM-D) δ 7.26 (d, *J* = 8.7 Hz, 2H), 6.77 (d, *J* = 18.8 Hz, 1H), 6.63 (d, *J* = 8.7 Hz, 2H), 6.22 (d, *J* = 18.8 Hz, 1H), 3.69 (s, 2H), 0.13 (s, 9H). <sup>13</sup>C NMR (101 MHz, CHLOROFORM-D) δ 146.5, 143.6, 129.5, 127.8, 124.8, 115.1, -1.0. The spectroscopic data corresponds to the reported data.<sup>13</sup>

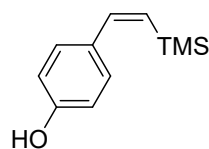

**4-[(Z)-2-(Trimethylsilyl)ethenyl]phenol (2o):** yellow liquid (26.8 mg, 93%, *Z/E*: 75/25). Eluent for the flash chromatography with silica gel: hexane/EA = 20/1. <sup>1</sup>H NMR (400 MHz, CHLOROFORM-D) δ 7.33 (d, *J* = 8.7 Hz, 2H), 6.83 – 6.76 (m, 3H), 6.29 (d, *J* = 18.8 Hz, 1H), 4.86 (s, 1H), 0.14 (s, 9H). <sup>13</sup>C NMR (101 MHz, CHLOROFORM-D) δ 155.6, 143.0, 131.8, 128.0, 127.0, 115.5, -1.0. HRMS (ESI-) calculated *m/z* for C<sub>11</sub>H<sub>15</sub>OSi<sup>-</sup> [M-H]<sup>-</sup>: 191.0898, found 191.0899.

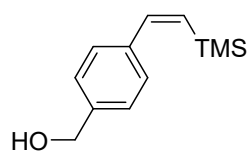

**4-[(Z)-2-(Trimethylsilyl)ethenyl]benzenemethanol (2p):** colorless liquid (29.8 mg, 95%, *Z/E*: 76/24). Eluent for the flash chromatography with silica gel: hexane/EA = 7/1. <sup>1</sup>H NMR (400 MHz, CHLOROFORM-D) δ 7.34 (d, *J* = 15.1 Hz, 1H), 7.32 – 7.25 (m, 4H), 5.83 (d, *J* = 15.1 Hz, 1H), 4.67 (s, 2H), 1.82 (s, 1H), 0.06 (s, 9H). <sup>13</sup>C NMR (101 MHz, CHLOROFORM-D) δ 146.3, 140.1, 139.6, 133.1, 128.5, 126.7, 65.3, 0.3. The spectroscopic data corresponds to the reported data.<sup>14</sup>



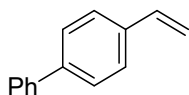

**4-Ethenyl-1,1'-biphenyl (2q):** white solid (22.0 mg, 61%). Eluent for the flash chromatography with silica gel: hexane.  $^1\text{H}$  NMR (400 MHz, CHLOROFORM-D)  $\delta$  7.66 – 7.58 (m, 4H), 7.51 (d,  $J$  = 8.3 Hz, 2H), 7.46 (t,  $J$  = 7.6 Hz, 2H), 7.37 (t,  $J$  = 7.4 Hz, 1H), 6.79 (dd,  $J$  = 17.6, 10.9 Hz, 1H), 5.82 (d,  $J$  = 17.5 Hz, 1H), 5.30 (d,  $J$  = 10.9 Hz, 1H).  $^{13}\text{C}$  NMR (101 MHz, CHLOROFORM-D)  $\delta$  140.8, 140.7, 136.7, 136.5, 128.9, 127.4, 127.4, 127.1, 126.8, 114.0. The spectroscopic data corresponds to the reported data.<sup>5</sup>

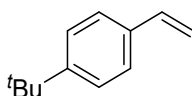

**4-tert-Butylstyrene (2r):** colorless liquid (19.9 mg, 62%). Eluent for the flash chromatography with silica gel: hexane.  $^1\text{H}$  NMR (400 MHz, CHLOROFORM-D)  $\delta$  7.37 (s, 4H), 6.72 (dd,  $J$  = 17.6, 10.9 Hz, 1H), 5.73 (d,  $J$  = 17.5 Hz, 1H), 5.21 (d,  $J$  = 10.7 Hz, 1H), 1.34 (s, 9H).  $^{13}\text{C}$  NMR (101 MHz, CHLOROFORM-D)  $\delta$  151.0, 136.7, 135.0, 126.1, 125.6, 113.2, 34.7, 31.4. The spectroscopic data corresponds to the reported data.<sup>15</sup>

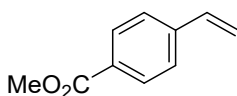

**Methyl 4-vinylbenzoate (2s):** white solid (17.8 mg, 55%). Eluent for the flash chromatography with silica gel: hexane/EA: 60/1.  $^1\text{H}$  NMR (400 MHz, CHLOROFORM-D)  $\delta$  7.98 (d,  $J$  = 8.3 Hz, 2H), 7.45 (d,  $J$  = 8.3 Hz, 2H), 6.74 (dd,  $J$  = 17.4, 11.0 Hz, 1H), 5.85 (d,  $J$  = 17.9 Hz, 1H), 5.37 (d,  $J$  = 11.0 Hz, 1H), 3.90 (s, 3H).  $^{13}\text{C}$  NMR (101 MHz, CHLOROFORM-D)  $\delta$  167.0, 142.1, 136.2, 130.0, 129.4, 126.3, 116.6, 52.2. The spectroscopic data corresponds to the reported data.<sup>16</sup>

## 7. References

1. M. J. Mio, L. C. Kopel, J. B. Braun, T. L. Gadzikwa, K. L. Hull, R. G. Brisbois, C. J. Markworth and P. A. Grieco, *Org. Lett.*, 2002, **4**, 3199-3202.
2. X. Li, F. Yang and Y. Wu, *J. Org. Chem.*, 2013, **78**, 4543-4550.
3. A. Dasgupta, K. Stefkova, R. Babaahmadi, B. F. Yates, N. J. Buurma, A. Ariafard, E. Richards and R. L. Melen, *J. Am. Chem. Soc.*, 2021, **143**, 4451-4464.
4. C. W. D. Gallop, M.-T. Chen and O. Navarro, *Org. Lett.*, 2014, **16**, 3724-3727.
5. Y. Wu, Y. Ao, Z. Li, C. Liu, J. Zhao, W. Gao, X. Li, H. Wang, Y. Liu and Y. Liu, *Nat. Commun.*, 2023, **14**, 1655.
6. C.-C. Tai, M.-S. Yu, Y.-L. Chen, W.-H. Chuang, T.-H. Lin, G. P. A. Yap and T.-G. Ong, *Chem. Commun.*, 2014, **50**, 4344-4346.
7. L. Ilies, T. Yoshida and E. Nakamura, *J. Am. Chem. Soc.*, 2012, **134**, 16951-16954.
8. M. Gaydou, T. Moragas, F. Juliá-Hernández and R. Martin, *J. Am. Chem. Soc.*, 2017, **139**, 12161-12164.
9. D. Srimani, G. Leitus, Y. Ben-David and D. Milstein, *Angew. Chem. Int. Ed.*, 2014, **53**, 11092-11095.
10. G.-p. Lu, K. R. Voigtritter, C. Cai and B. H. Lipshutz, *Chem. Commun.*, 2012, **48**, 8661-8663.
11. G. Cahiez, G. Lefèvre, A. Moyeux, O. Guerret, E. Gayon, L. Guillonnet, N. Lefèvre, Q. Gu and E. Zhou, *Org. Lett.*, 2019, **21**, 2679-2683.
12. S. I. Faßbender, J. J. Molloy, C. Mück-Lichtenfeld and R. Gilmour, *Angew. Chem. Int. Ed.*, 2019, **58**, 18619-18626.
13. M. Espinal-Viguri, S. E. Neale, N. T. Coles, S. A. Macgregor and R. L. Webster, *J. Am. Chem. Soc.*, 2019, **141**, 572-582.
14. N. Gorgas, J. Brünig, B. Stöger, S. Vanicek, M. Tilset, L. F. Veiros and K. Kirchner, *J. Am. Chem. Soc.*, 2019, **141**, 17452-17458.
15. R. Kusy, M. Lindner, J. Wagner and K. Grela, *Chem Catal.*, 2022, **2**, 1346-1361.
16. G. Wienhöfer, F. A. Westerhaus, R. V. Jagadeesh, K. Junge, H. Junge and M. Beller, *Chem. Commun.*, 2012, **48**, 4827-4829.

## 8. Copies of $^1\text{H}$ , $^{13}\text{C}\{^1\text{H}\}$ , $^{19}\text{F}$ NMR Spectra for Synthesized Compounds

### 8.1 Copies of $^1\text{H}$ , $^{13}\text{C}\{^1\text{H}\}$ , $^{19}\text{F}$ NMR Spectra for Substrates 1

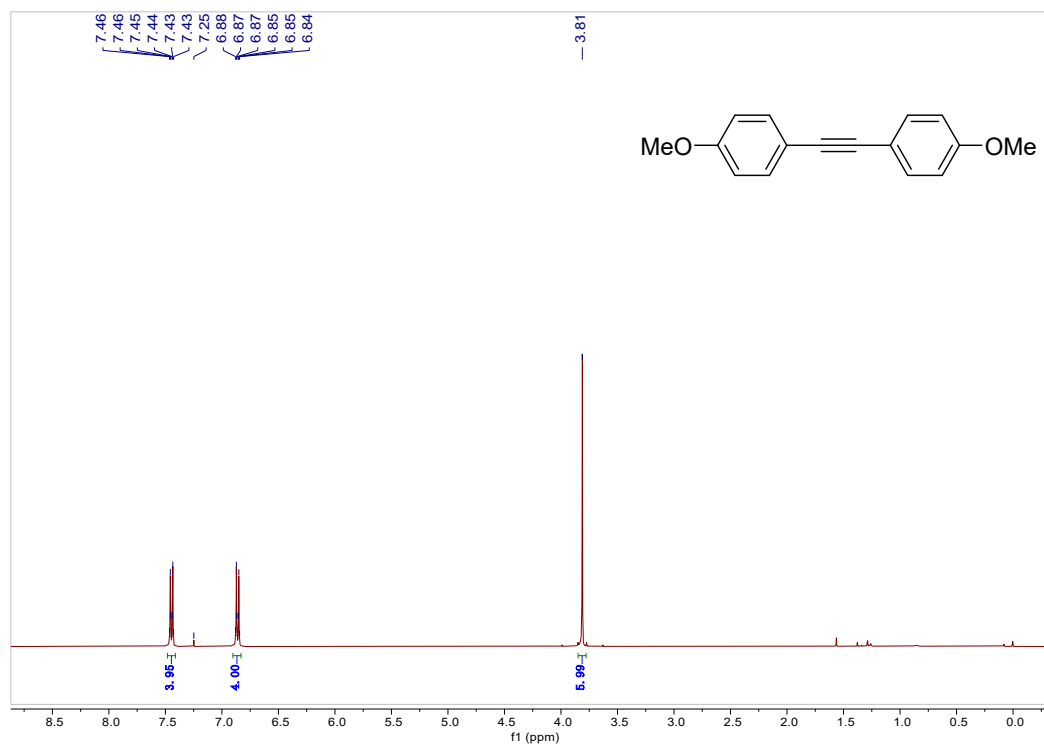

$^1\text{H}$  NMR for compound **1c**

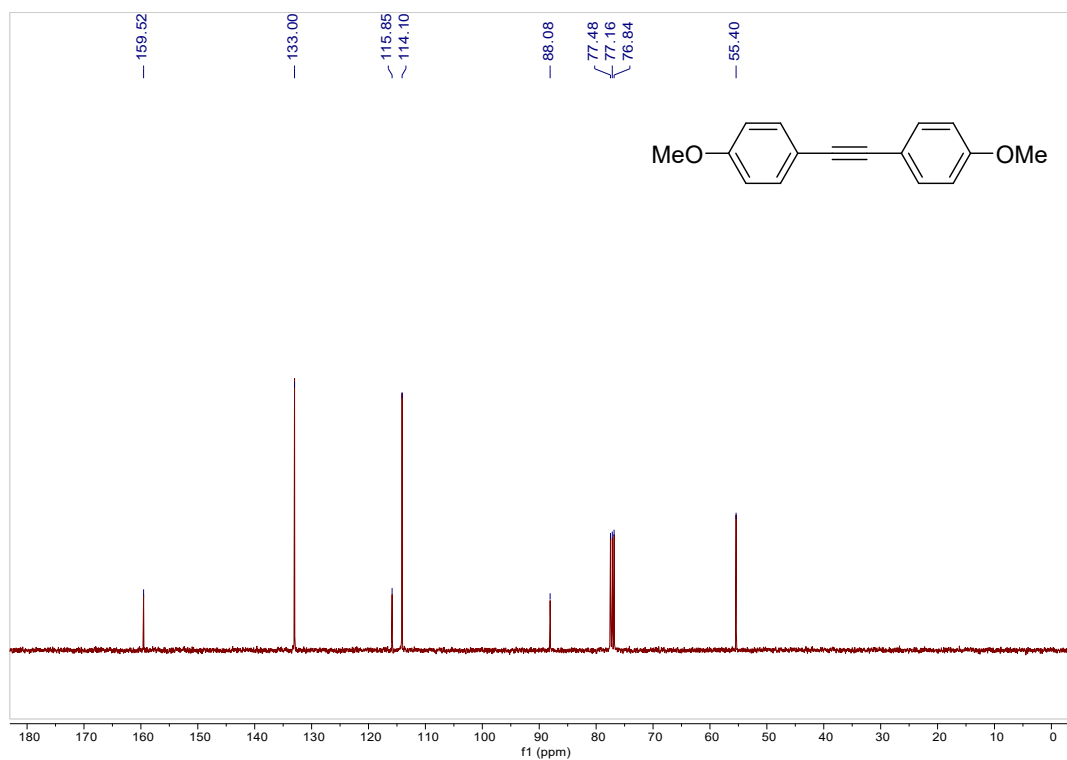

$^{13}\text{C}\{^1\text{H}\}$  NMR for compound **1c**

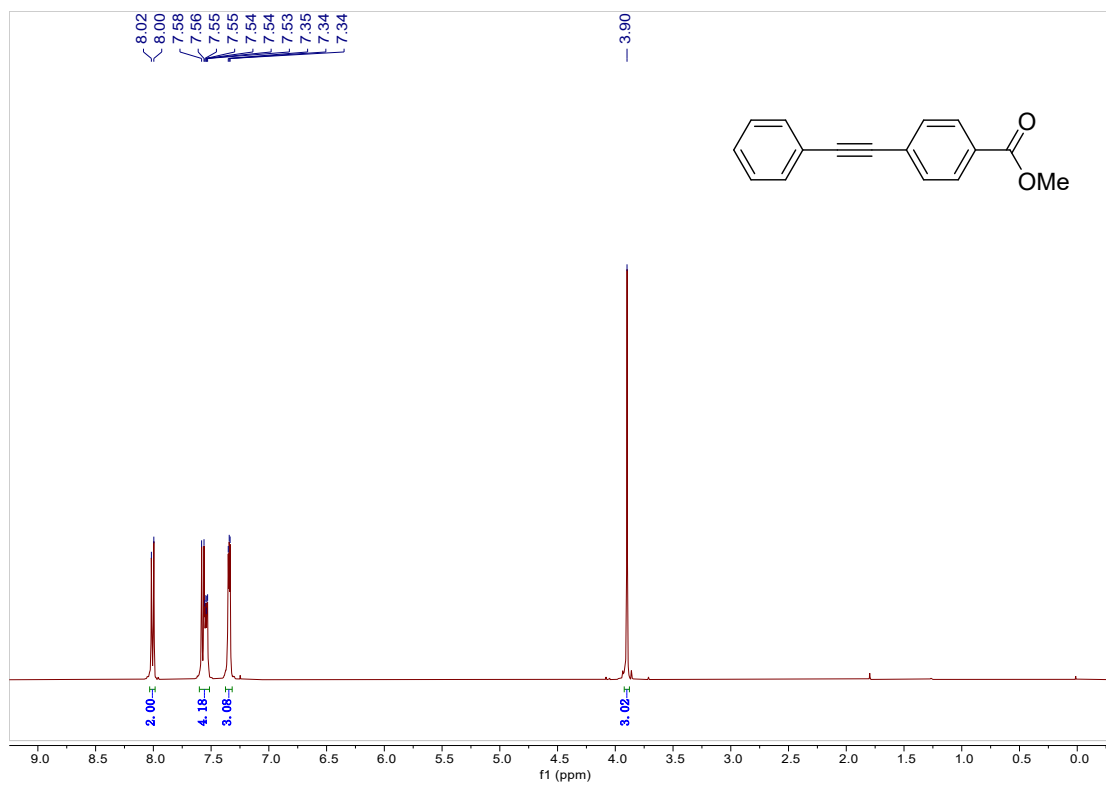

$^1\text{H NMR}$  for compound **1d**

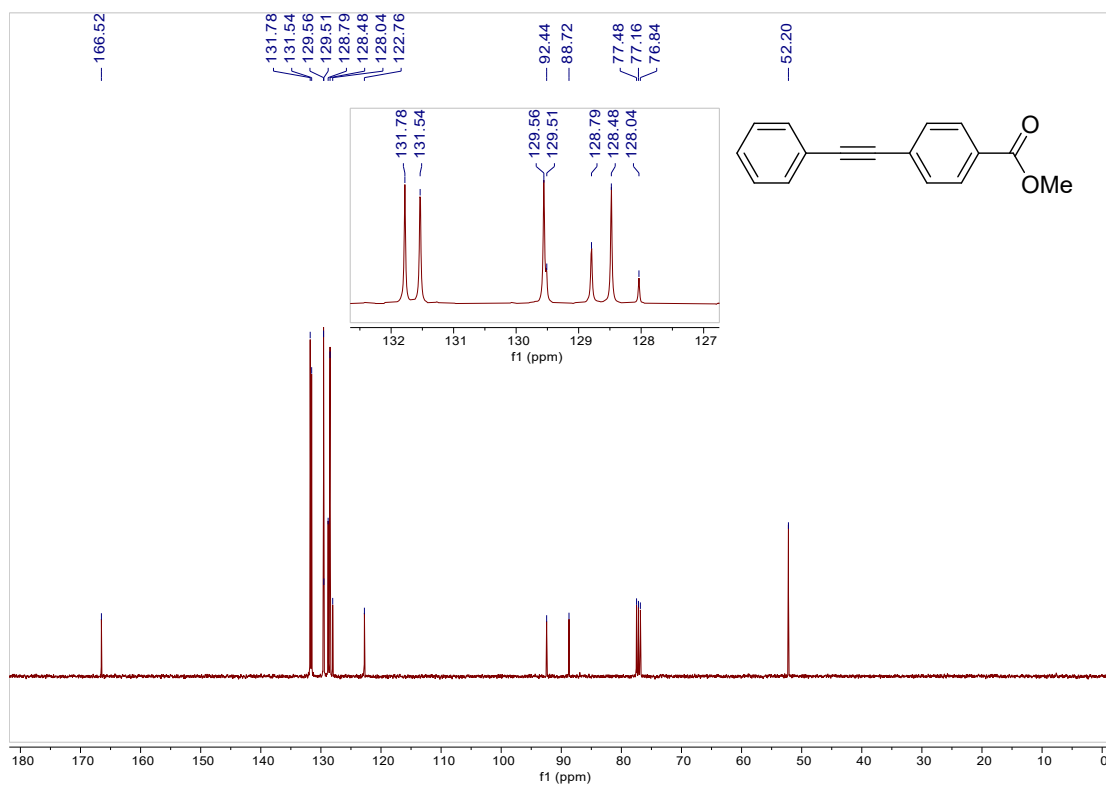

$^{13}\text{C}\{^1\text{H}\}$  NMR for compound **1d**

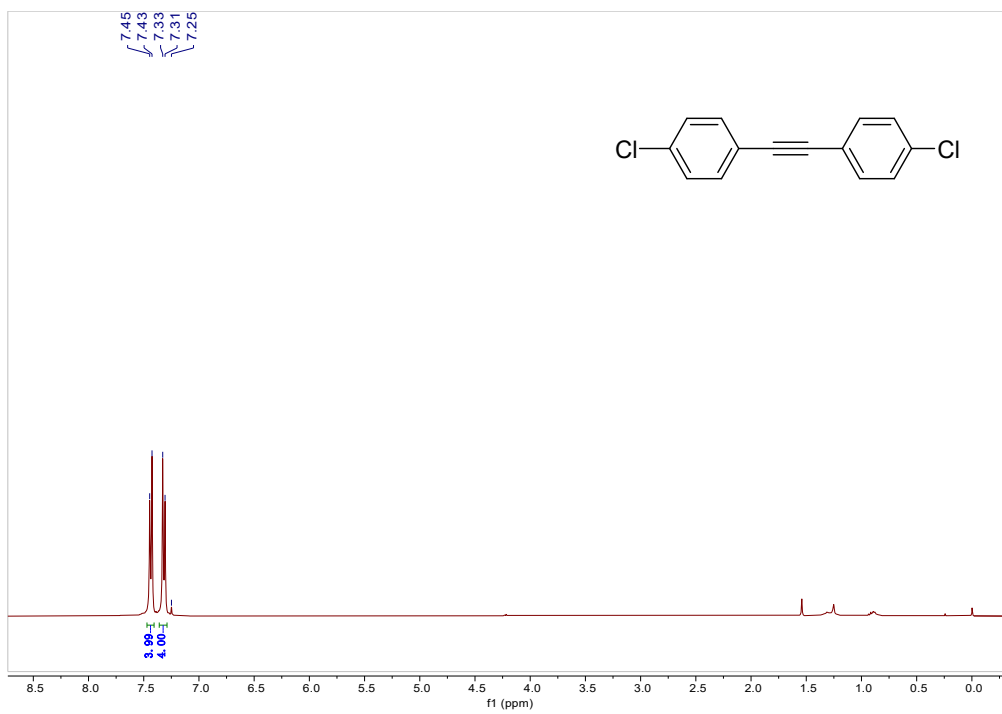

$^1\text{H}$  NMR for compound **1f**

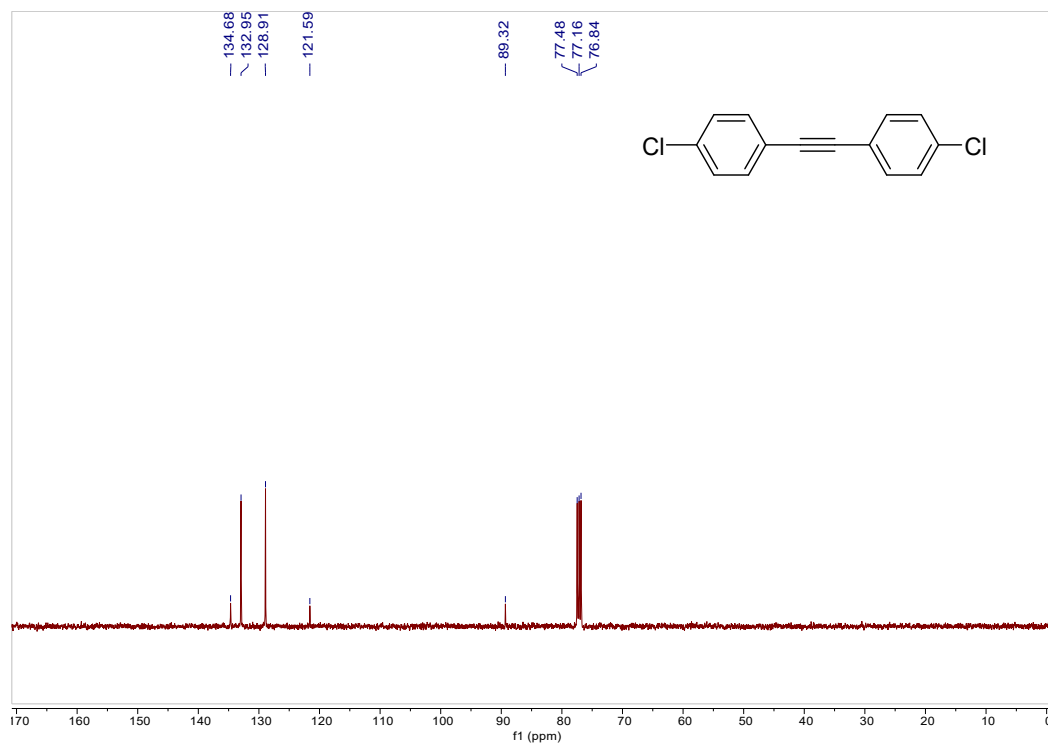

$^{13}\text{C}\{^1\text{H}\}$  NMR for compound **1f**

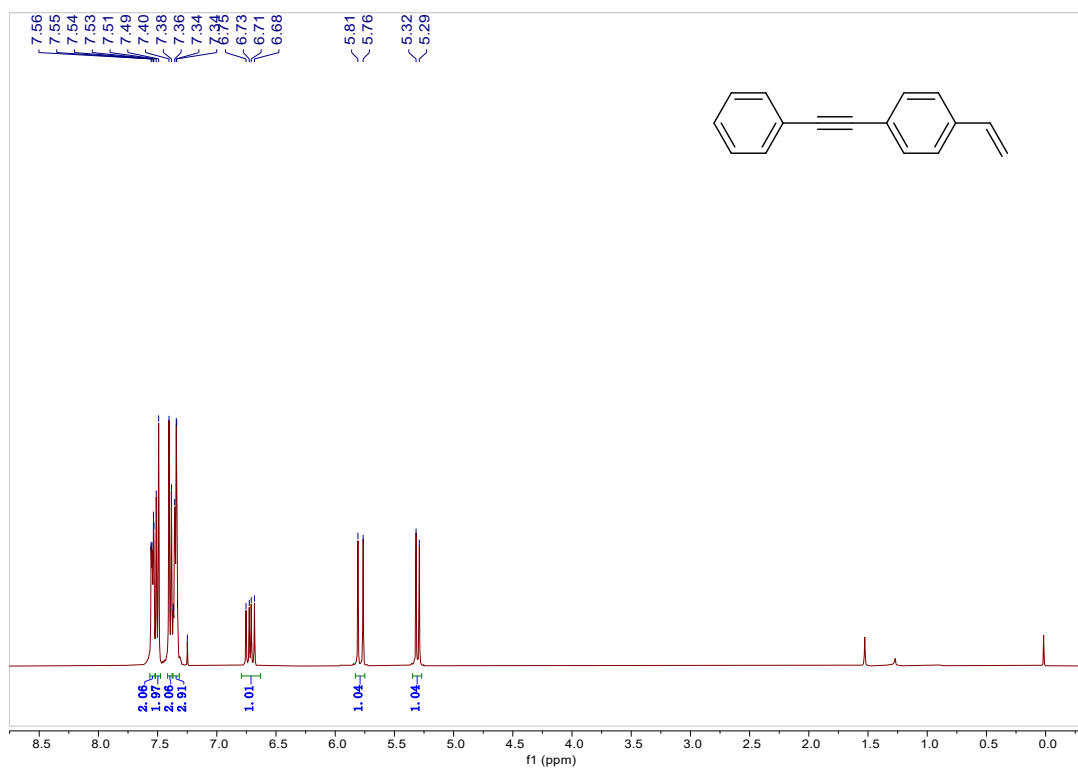

$^1\text{H}$  NMR for compound **1h**

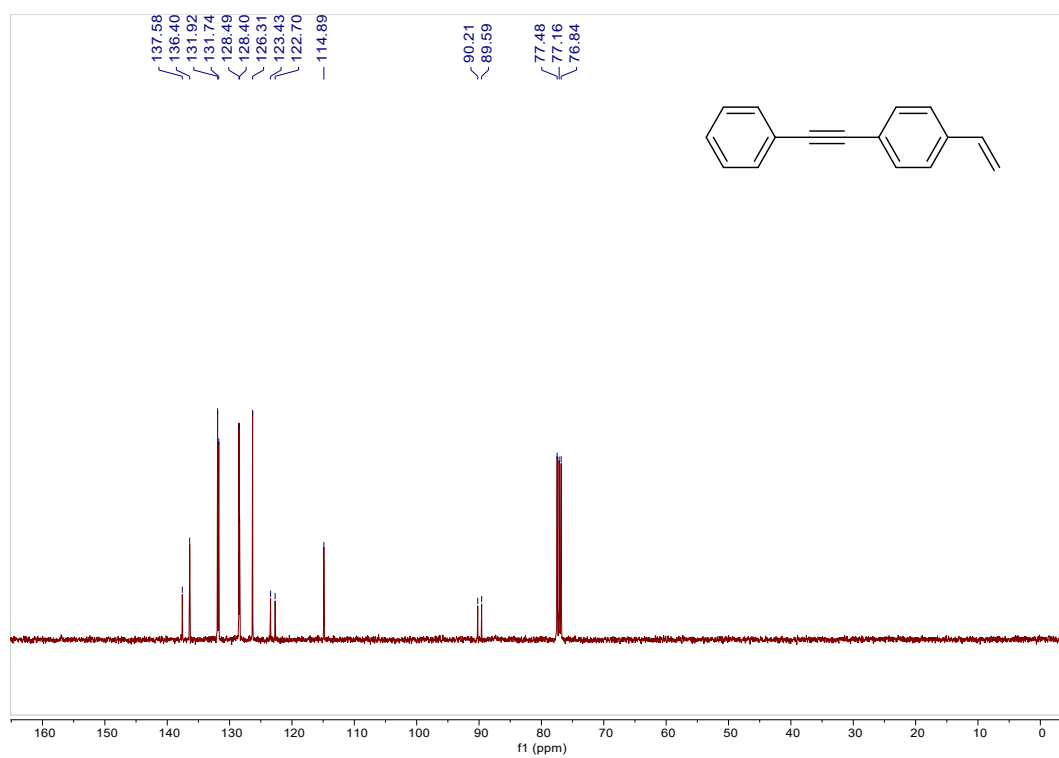

$^{13}\text{C}\{^1\text{H}\}$  NMR for compound **1h**

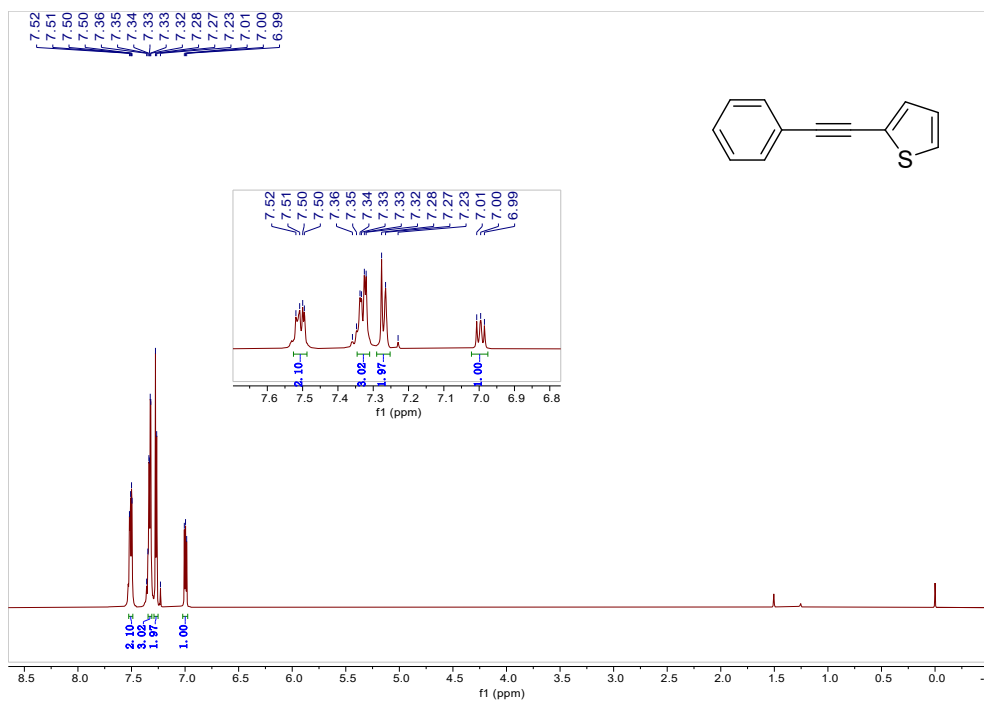

<sup>1</sup>H NMR for compound 1j

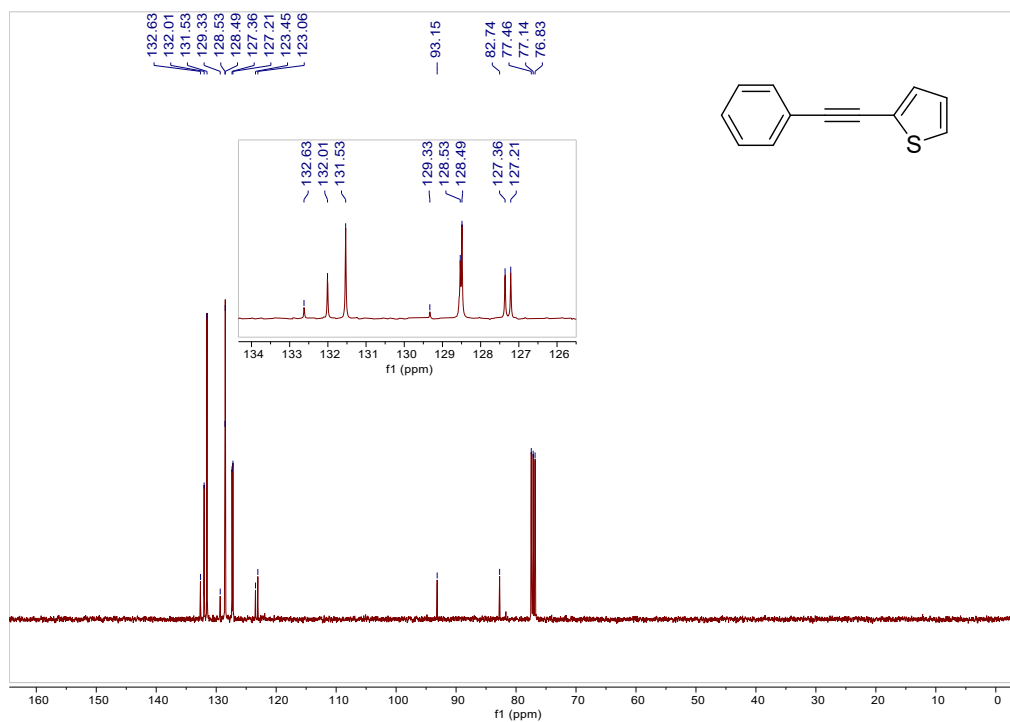

<sup>13</sup>C {<sup>1</sup>H} NMR for compound 1j

## 8.2 Copies of $^1\text{H}$ , $^{13}\text{C}\{^1\text{H}\}$ , $^{19}\text{F}$ NMR Spectra for Products 2 and 3

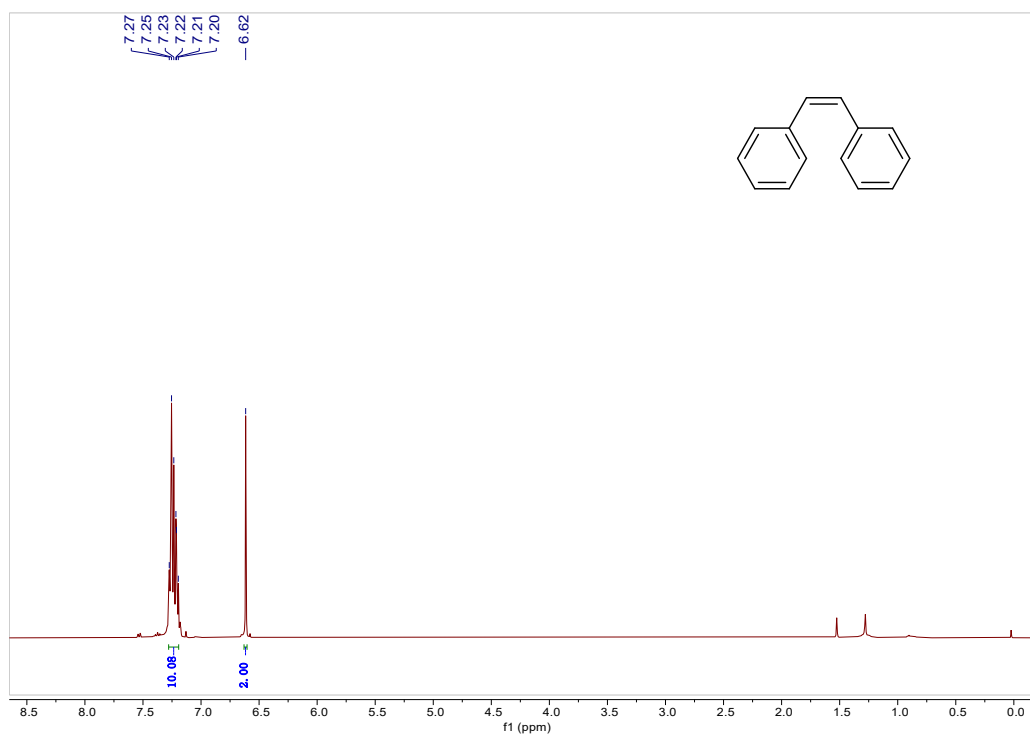

$^1\text{H}$  NMR for compound **2a**

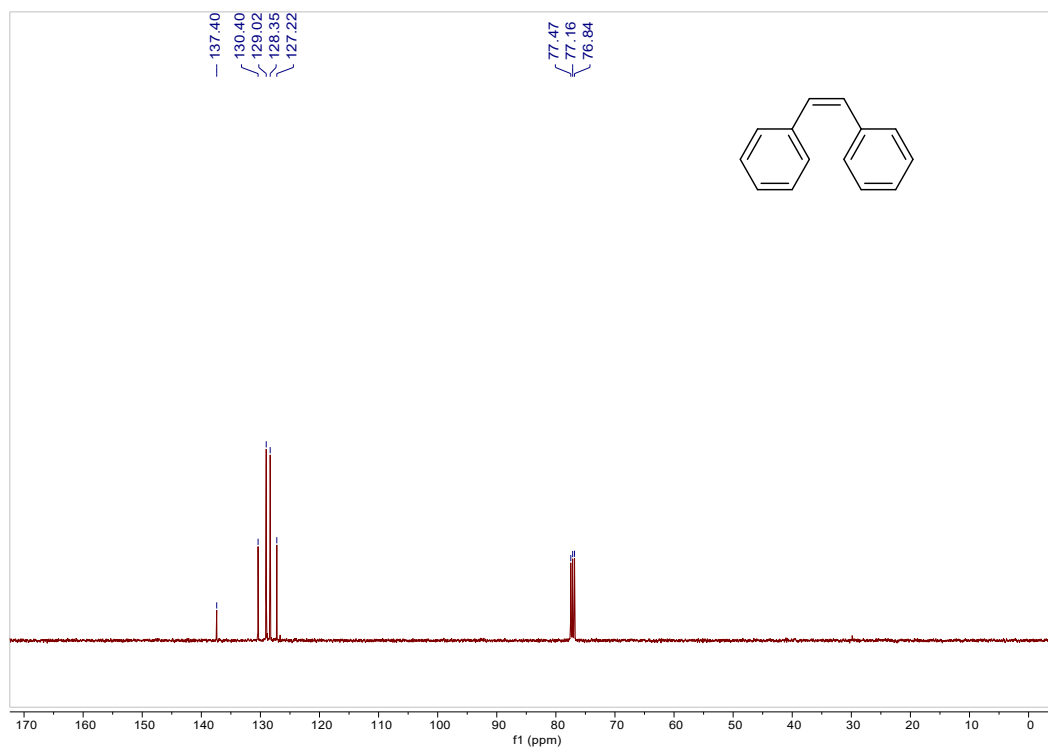

$^{13}\text{C}\{^1\text{H}\}$  NMR for compound **2a**



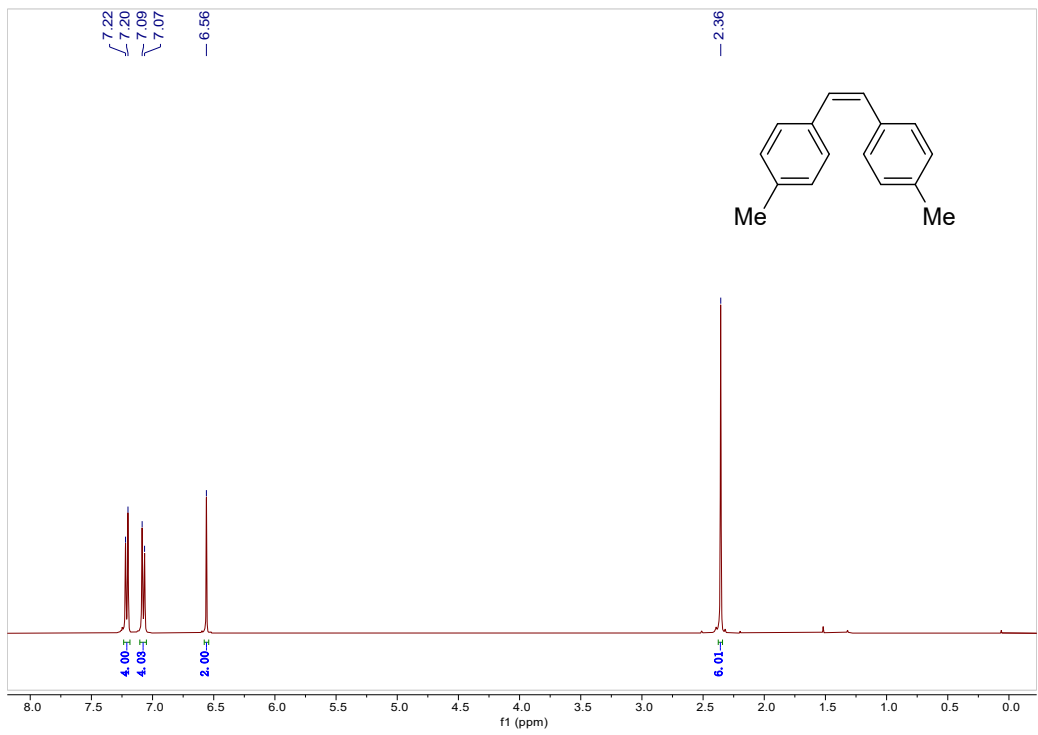

$^1\text{H}$  NMR for compound **2b**

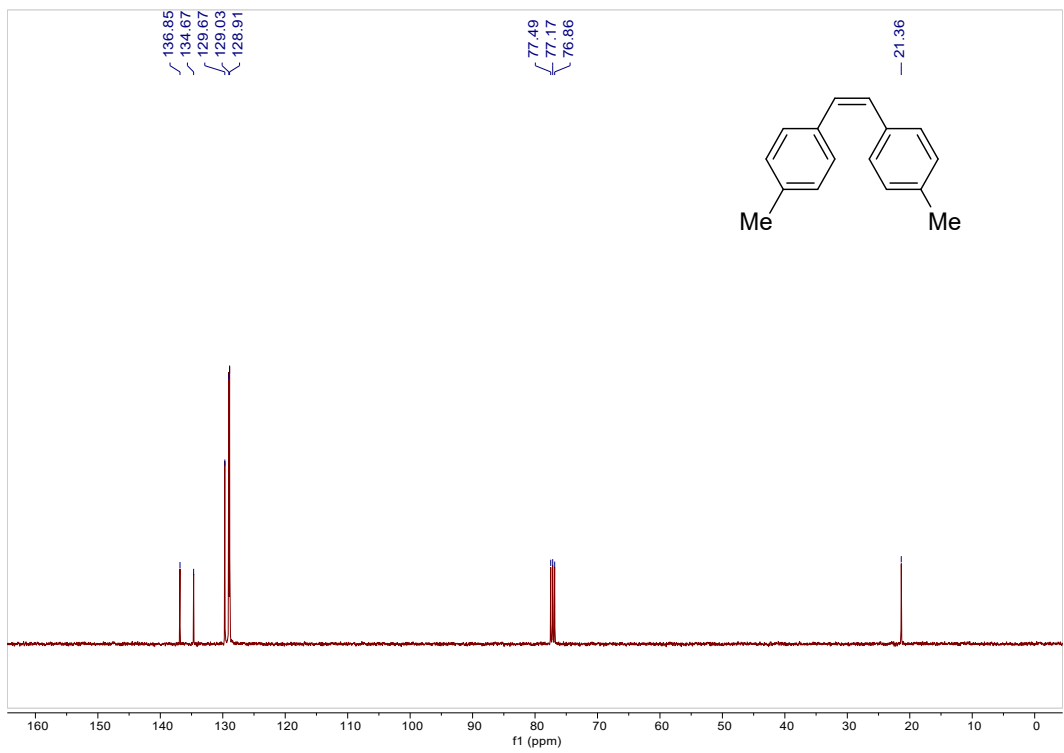

$^{13}\text{C}\{^1\text{H}\}$  NMR for compound **2b**

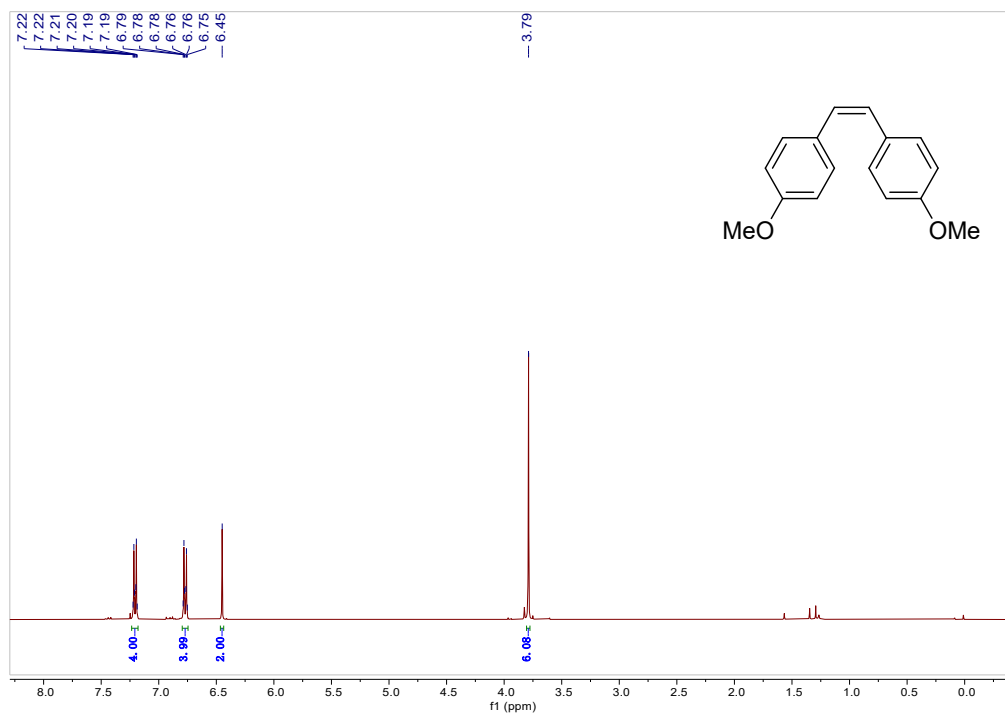

$^1\text{H}$  NMR for compound **2c**

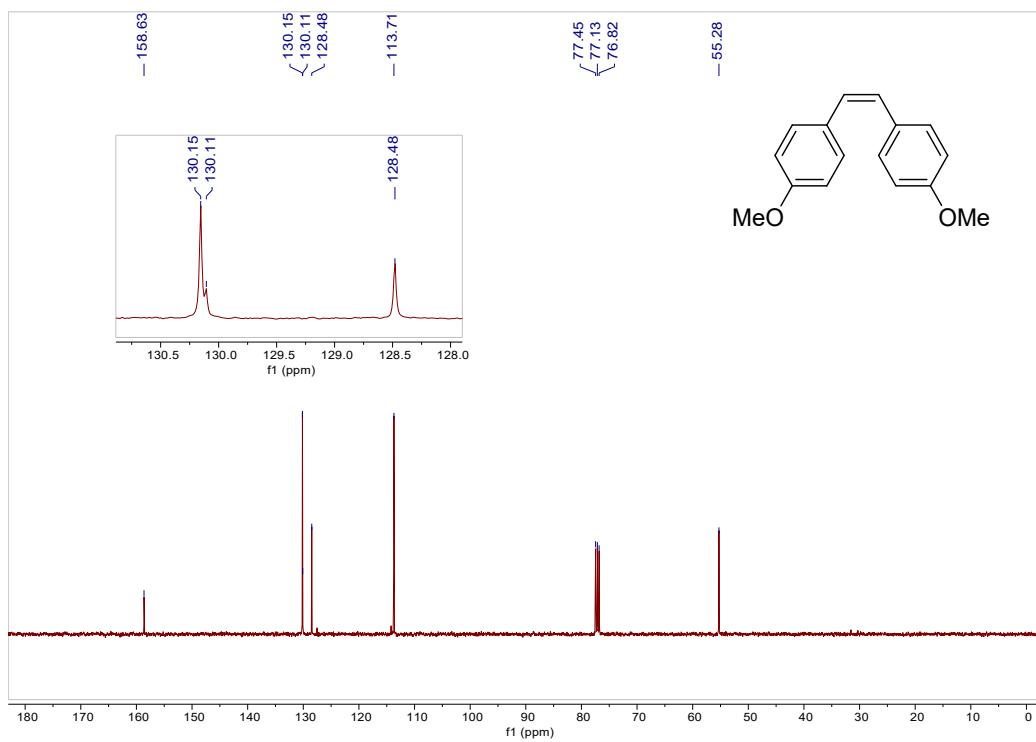

$^{13}\text{C}\{^1\text{H}\}$  NMR for compound **2c**

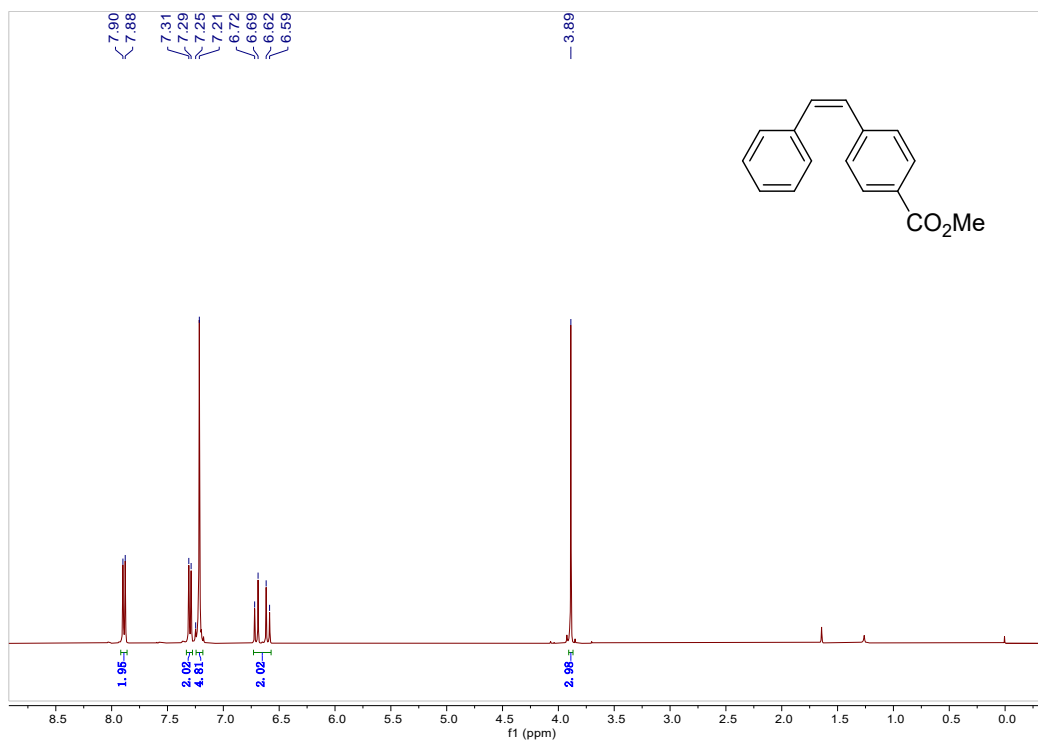

$^1\text{H}$  NMR for compound **2d**

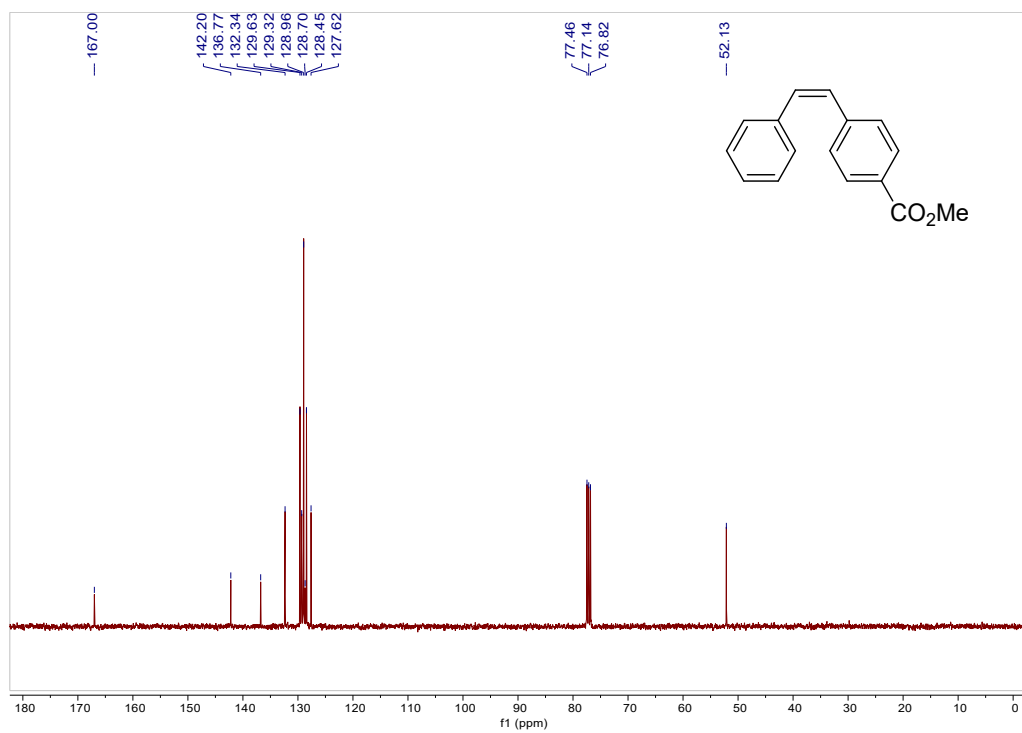

$^{13}\text{C}\{^1\text{H}\}$  NMR for compound **2d**

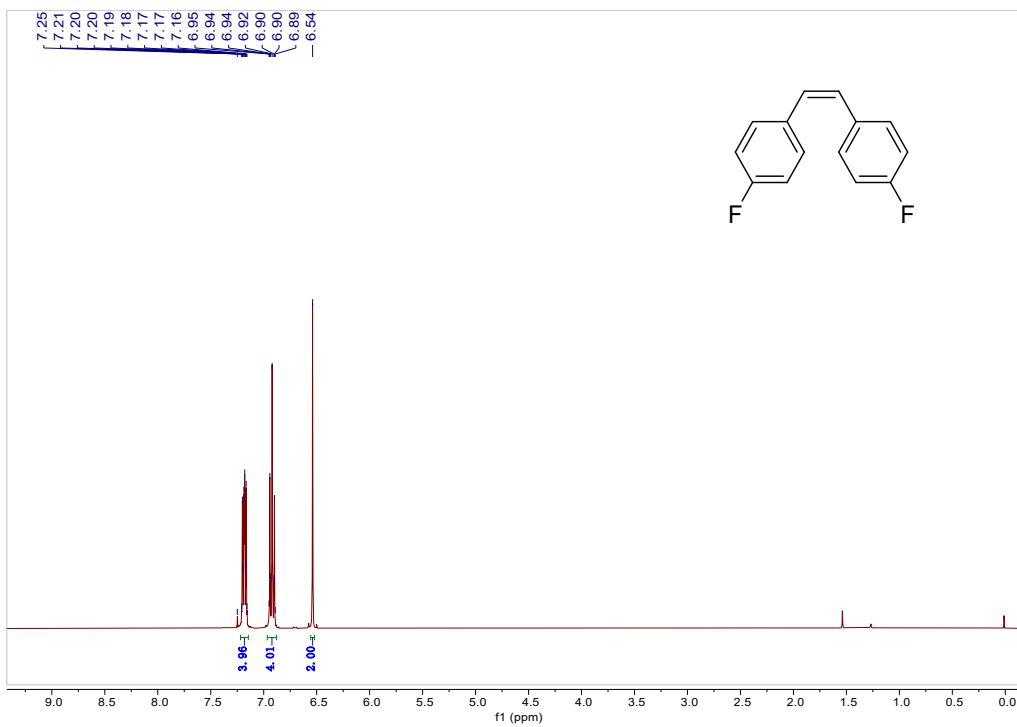

$^1\text{H}$  NMR for compound **2e**

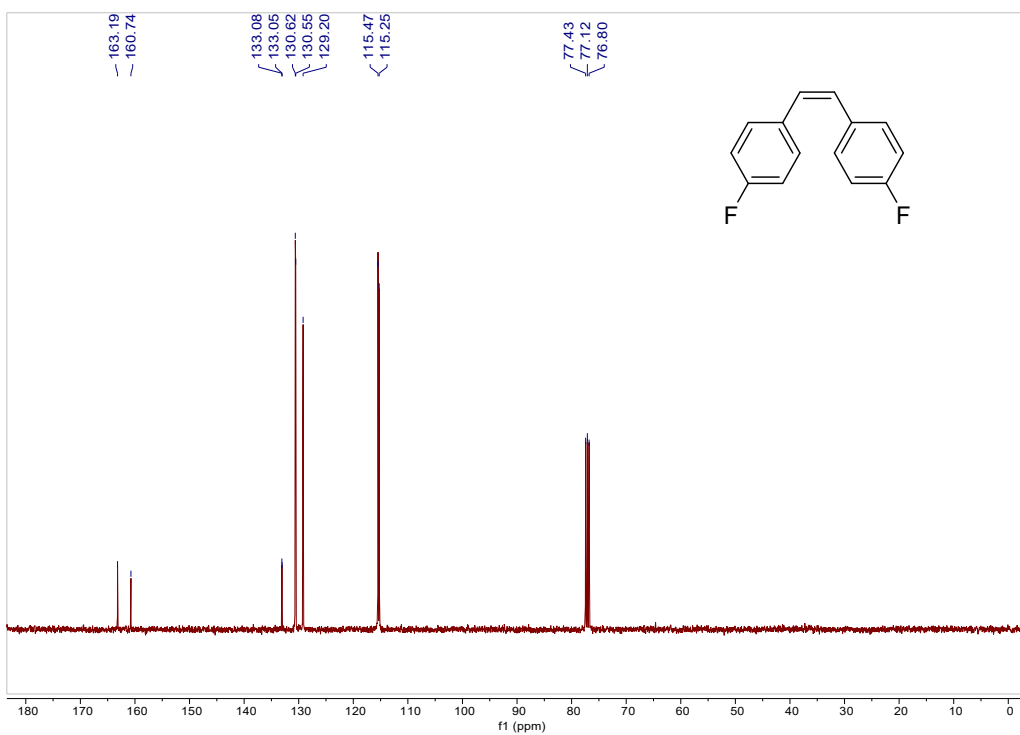

$^{13}\text{C}\{^1\text{H}\}$  NMR for compound **2e**

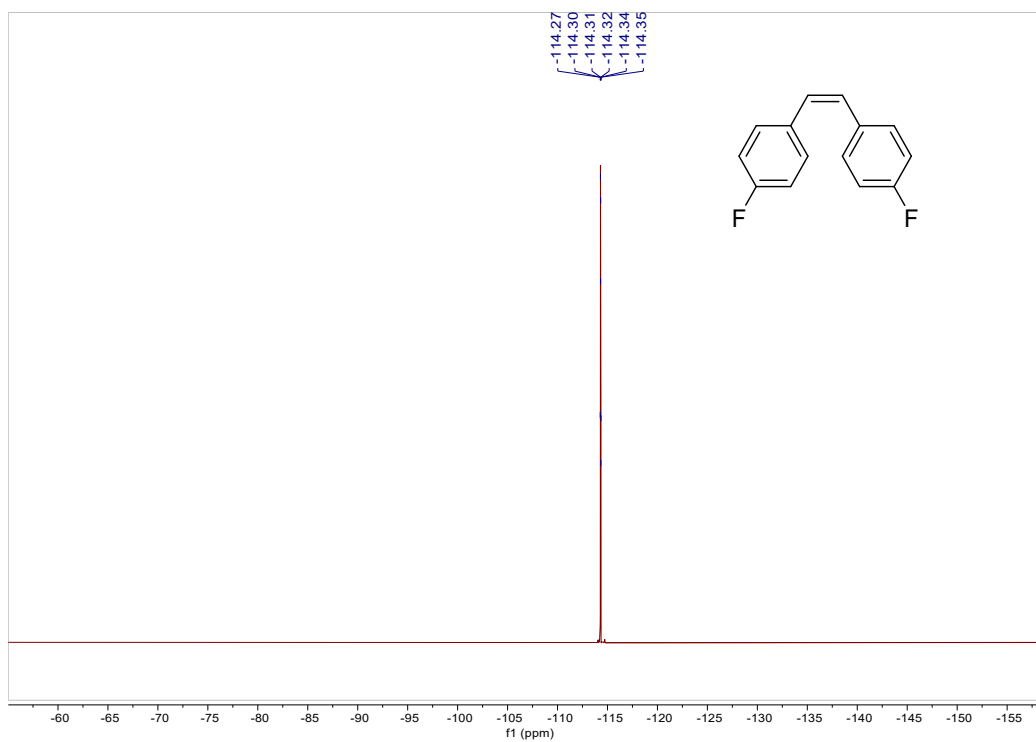

$^{19}\text{F}$  NMR for compound **2e**

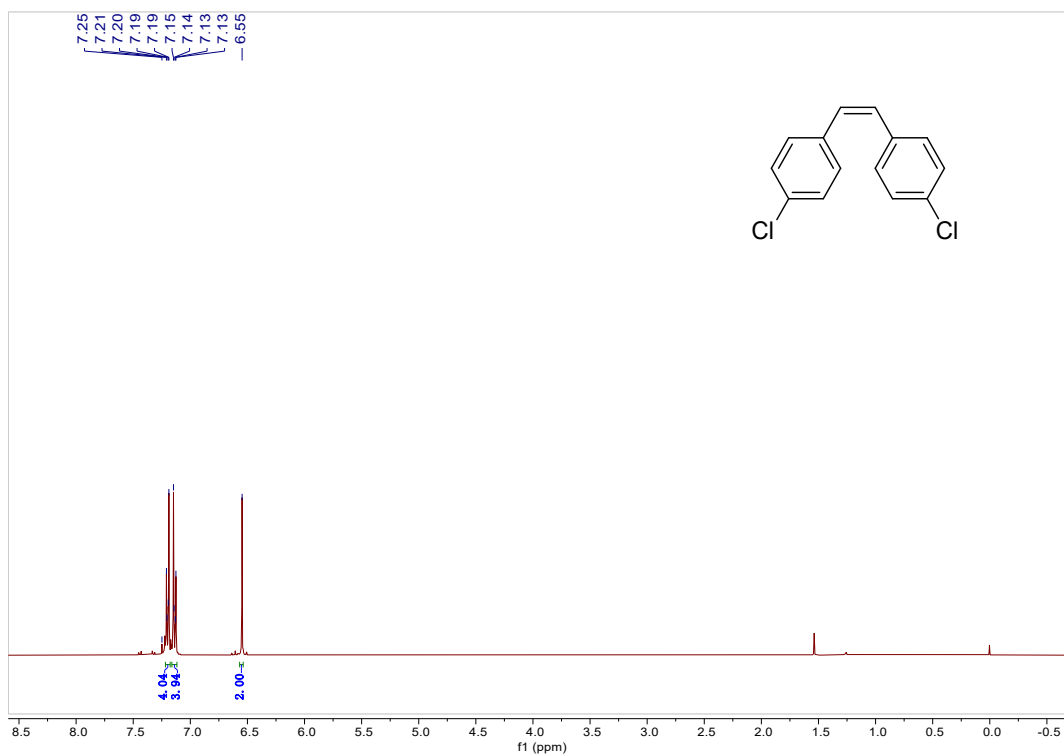

<sup>1</sup>H NMR for compound 2f

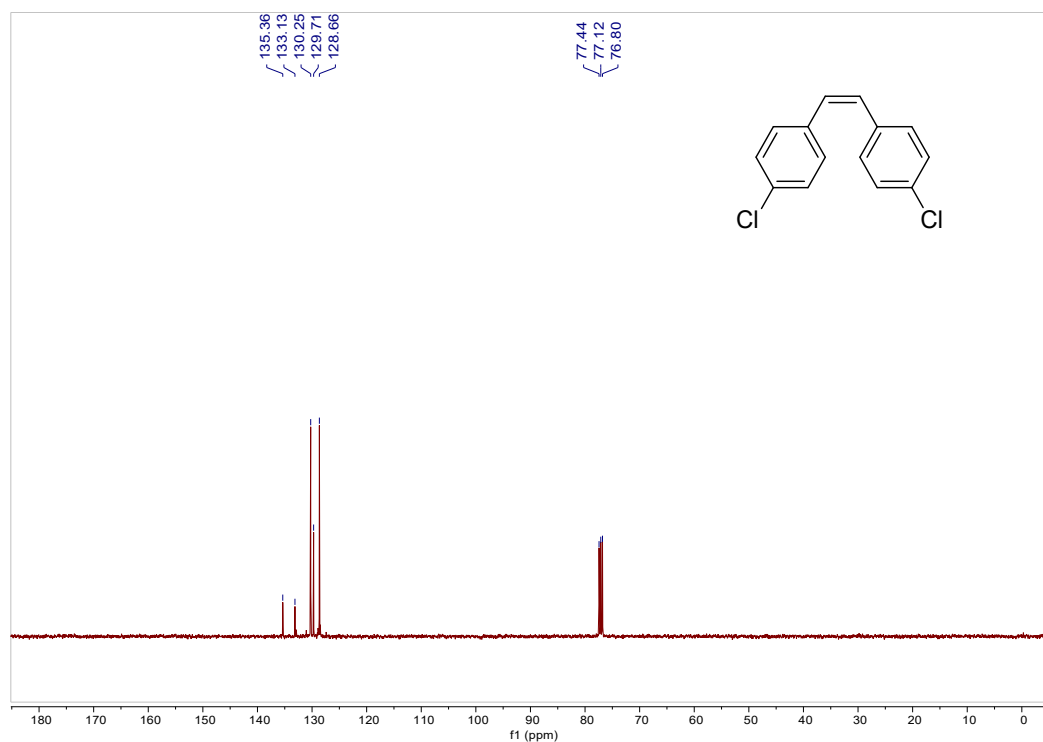

<sup>13</sup>C{<sup>1</sup>H} NMR for compound 2f



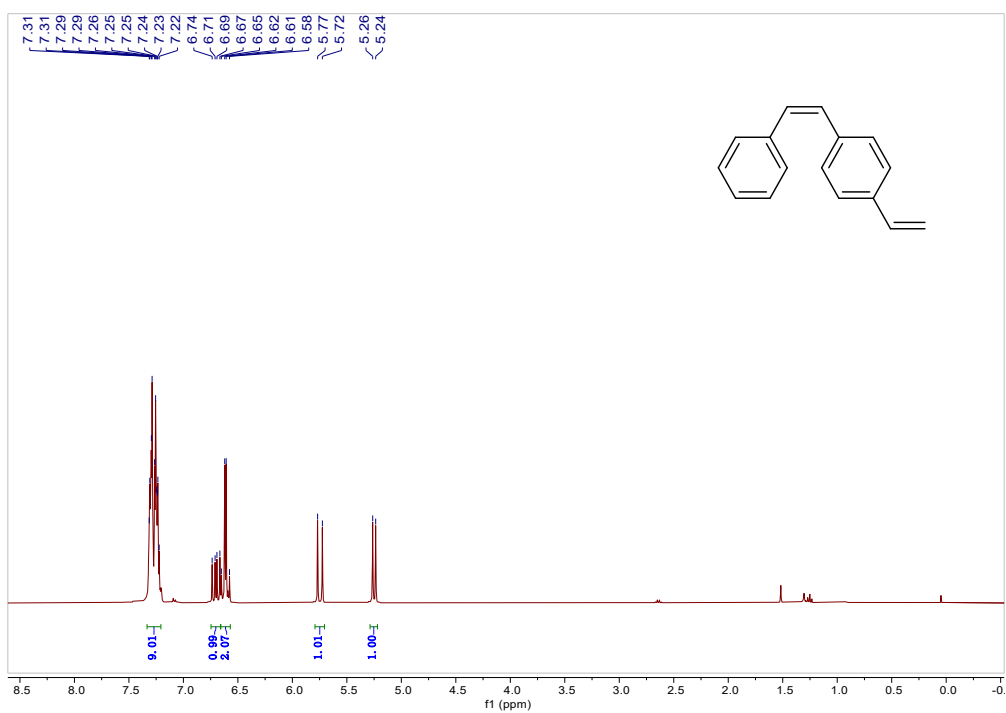

$^1\text{H}$  NMR for compound **2h**

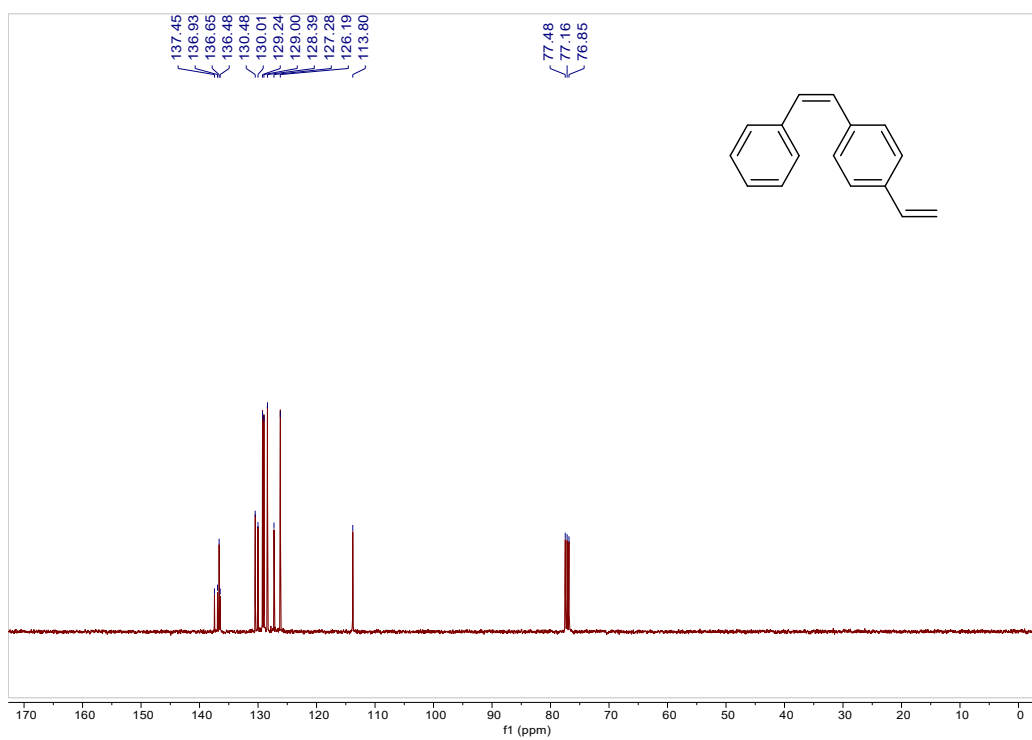

$^{13}\text{C}\{^1\text{H}\}$  NMR for compound **2h**



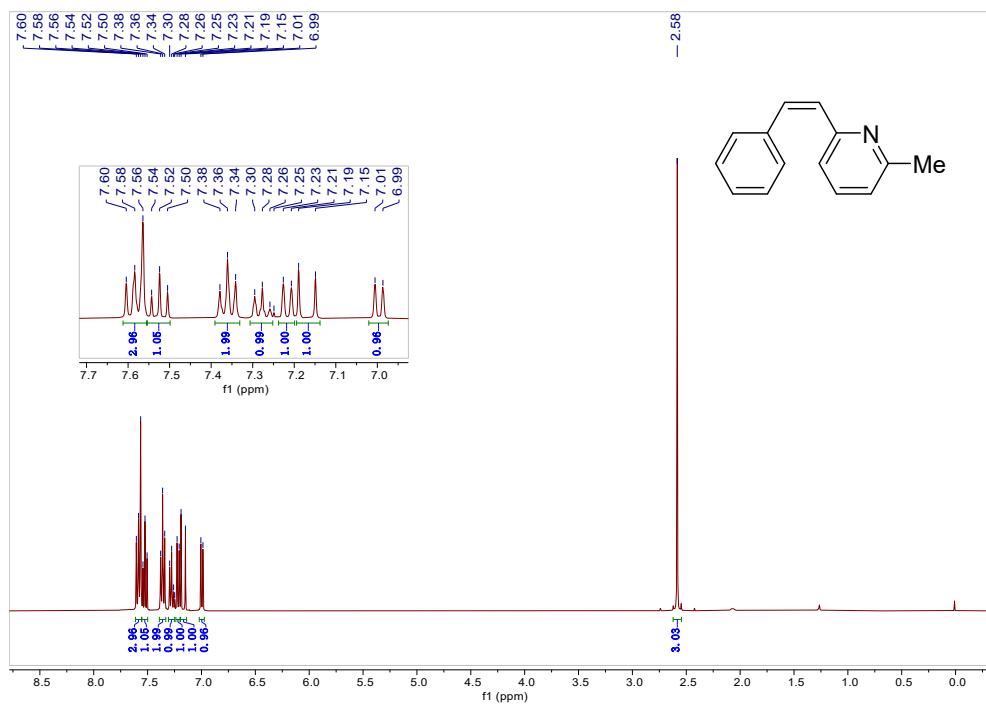

<sup>1</sup>H NMR for compound 2i

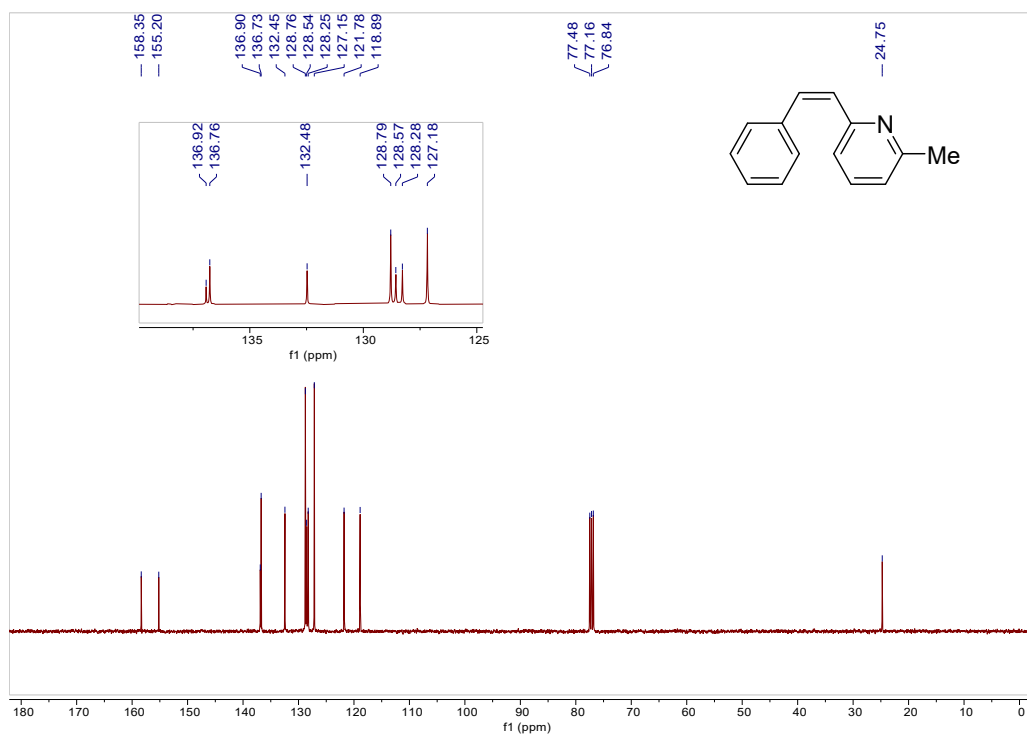

<sup>13</sup>C {<sup>1</sup>H} NMR for compound 2i

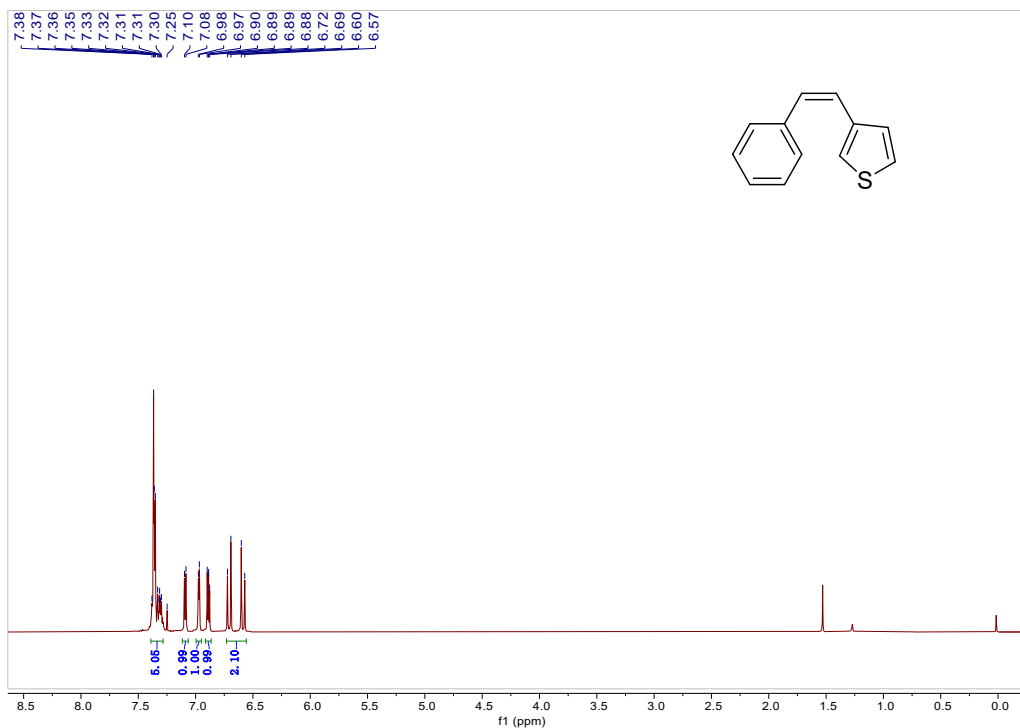

$^1\text{H}$  NMR for compound **2j**

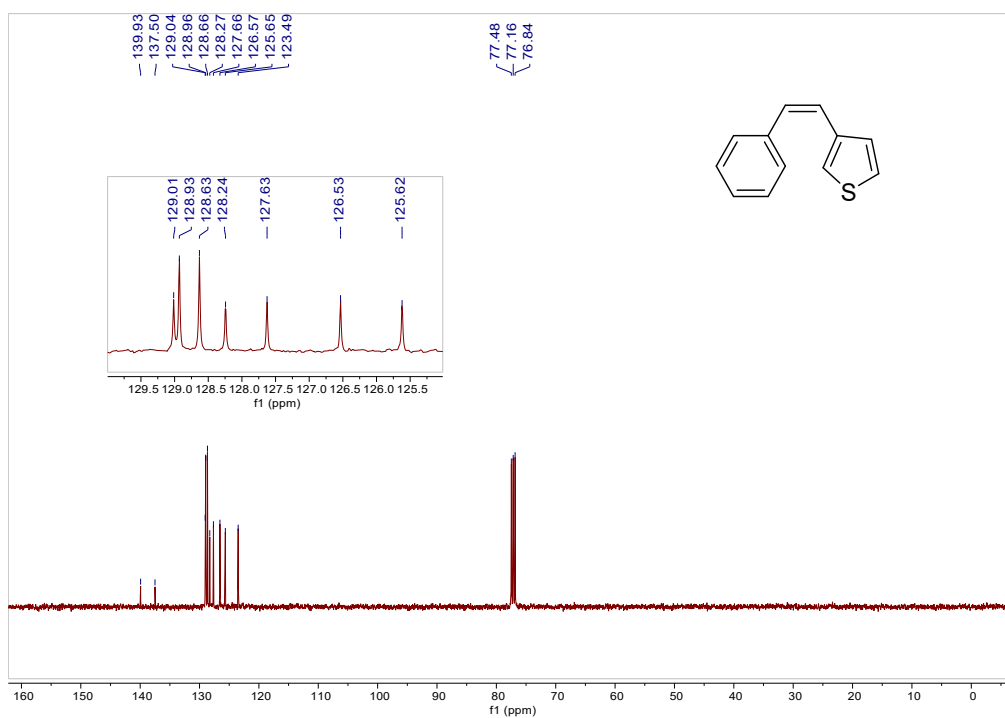

$^{13}\text{C}\{^1\text{H}\}$  NMR for compound **2j**

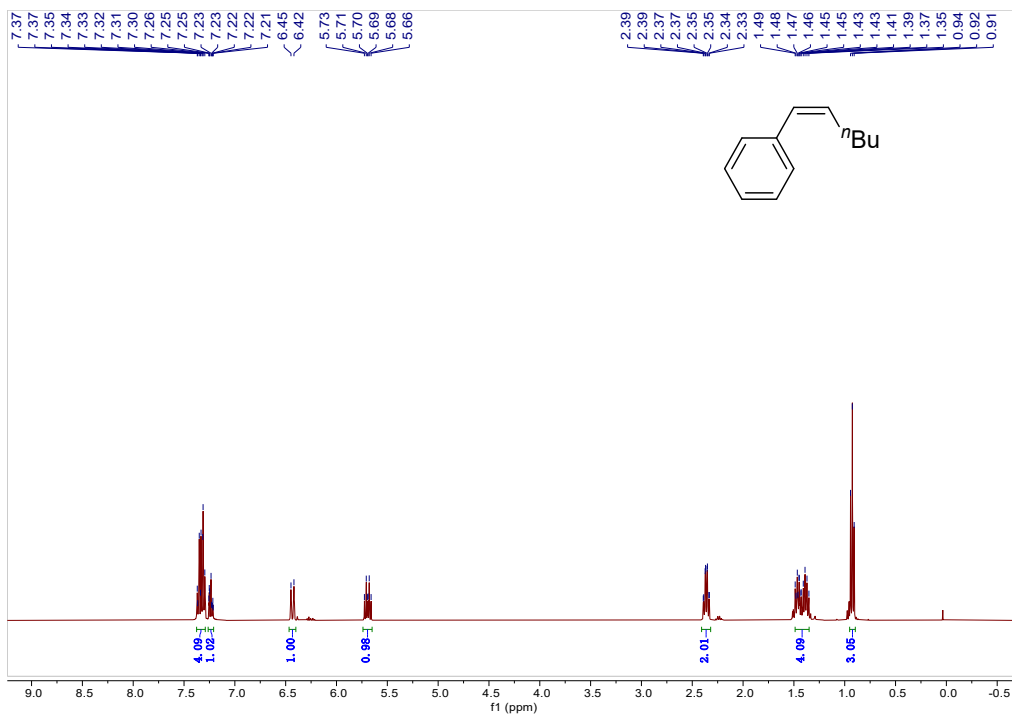

$^1\text{H}$  NMR for compound **2k**

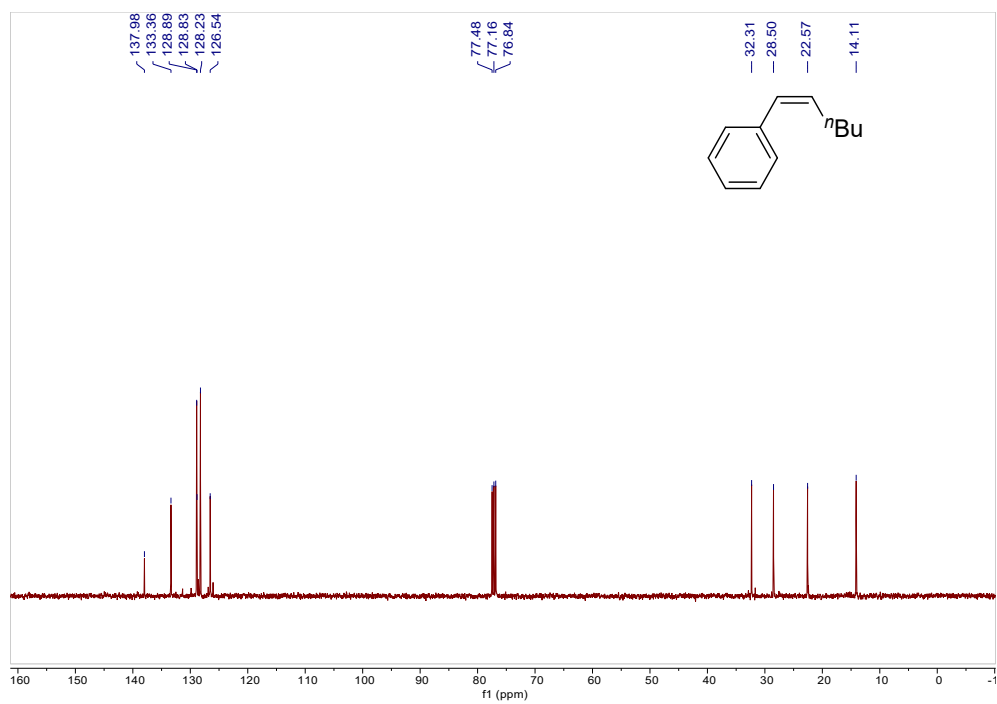

$^{13}\text{C}\{^1\text{H}\}$  NMR for compound **2k**

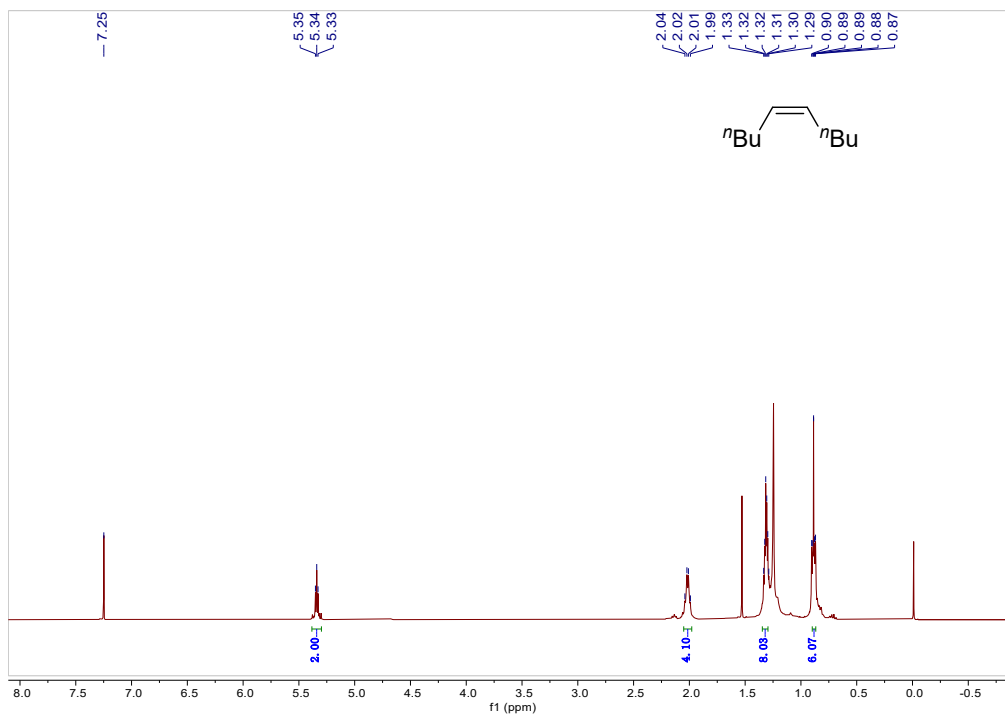

$^1\text{H}$  NMR for compound **2I**

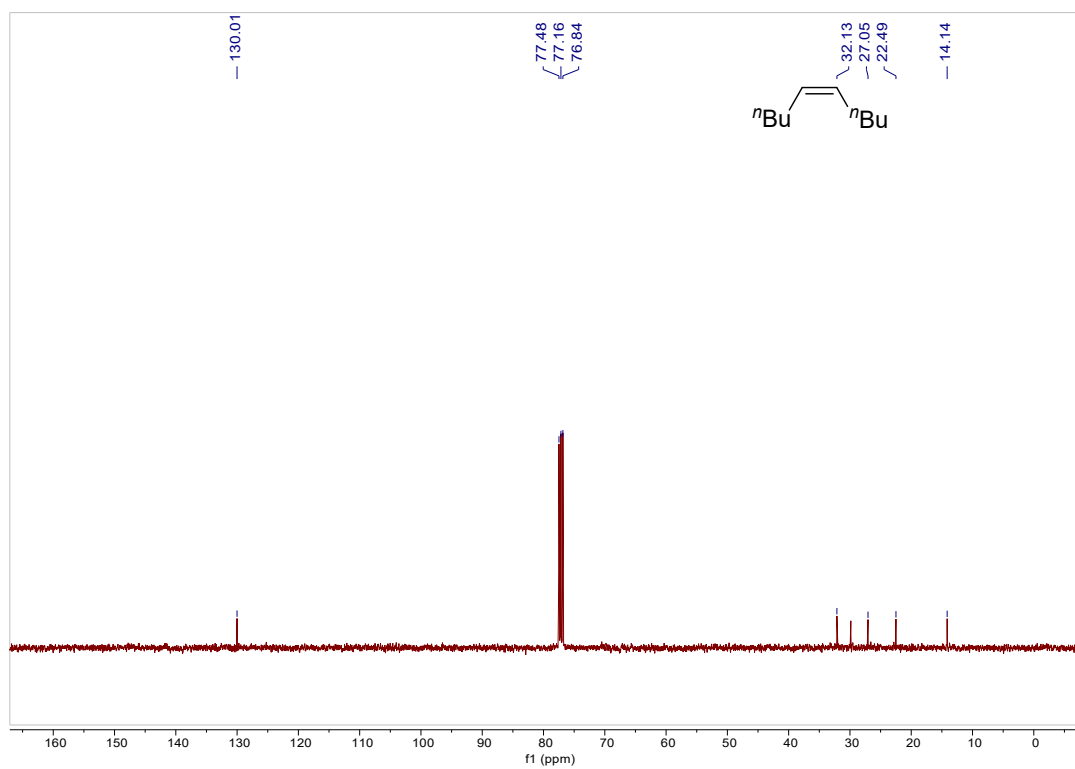

$^{13}\text{C}\{^1\text{H}\}$  NMR for compound **2I**

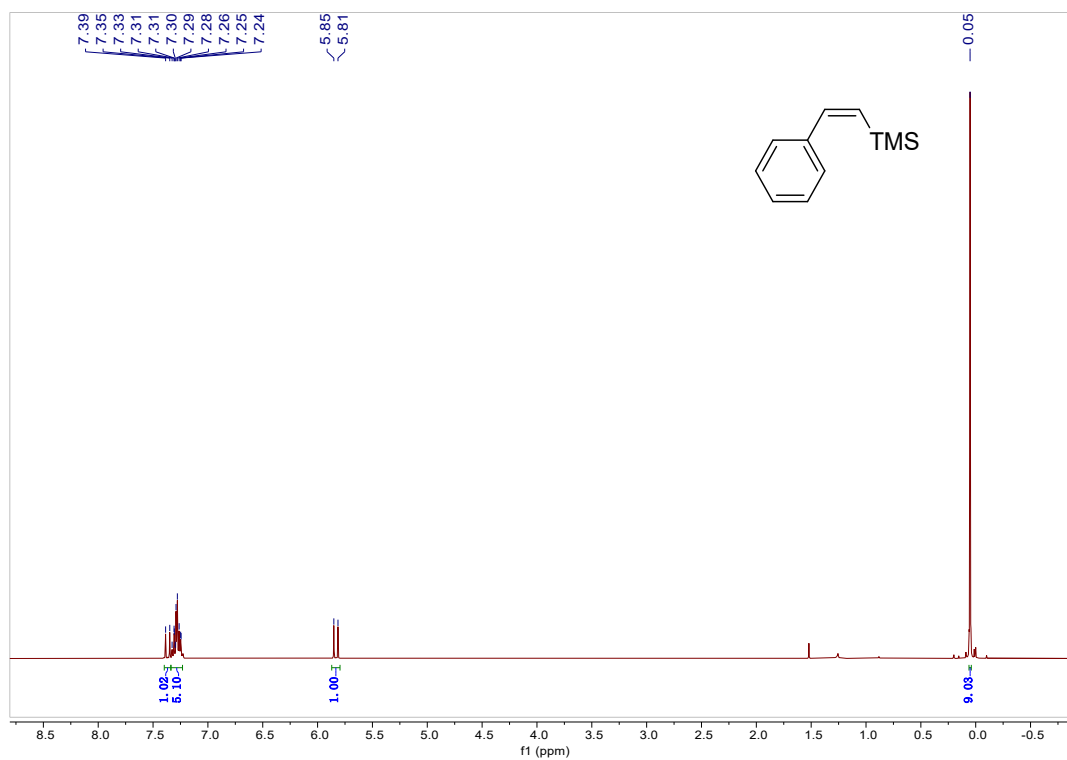

$^1\text{H}$  NMR for compound **2m**

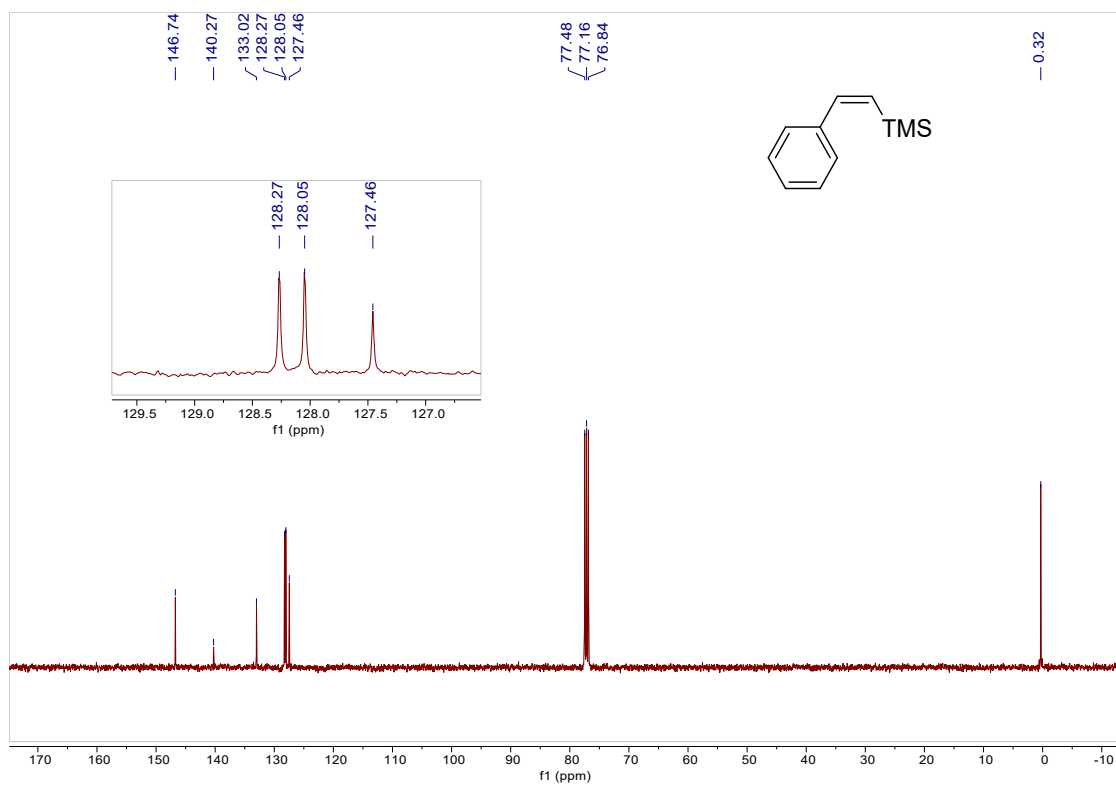

$^{13}\text{C}\{^1\text{H}\}$  NMR for compound **2m**

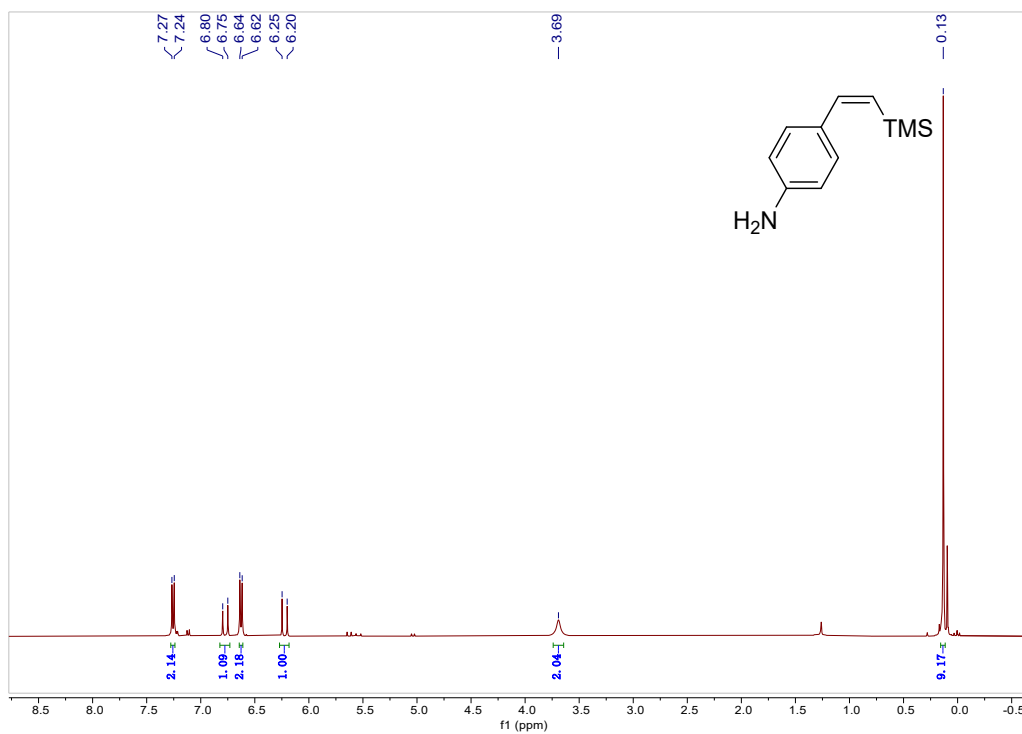

$^1\text{H}$  NMR for compound **2n**

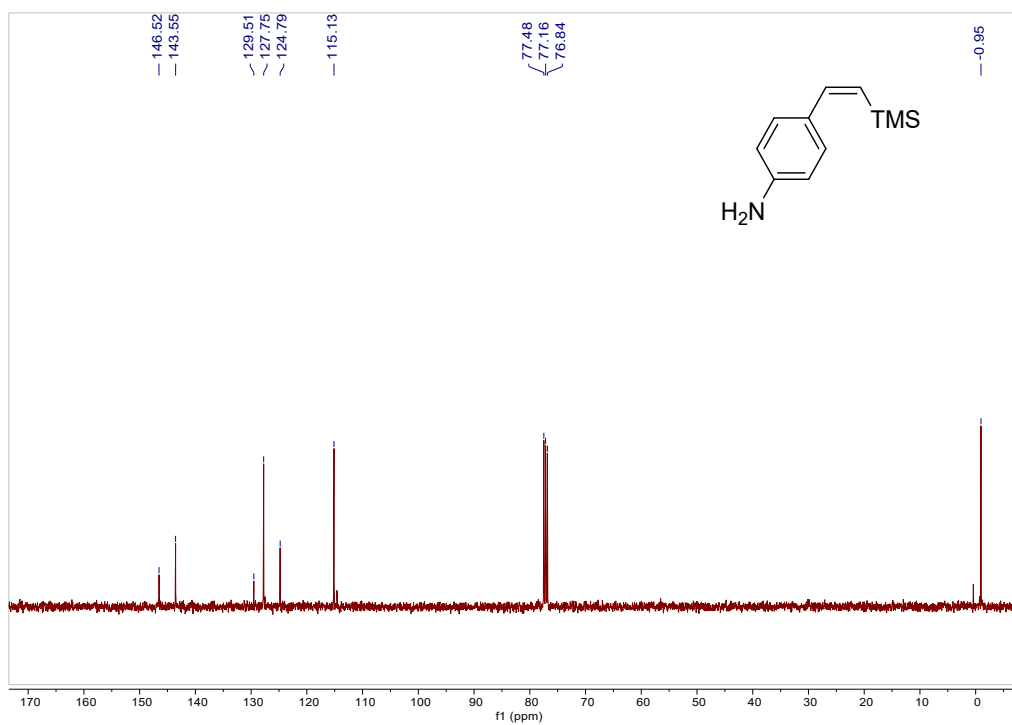

$^{13}\text{C}\{^1\text{H}\}$  NMR for compound **2n**

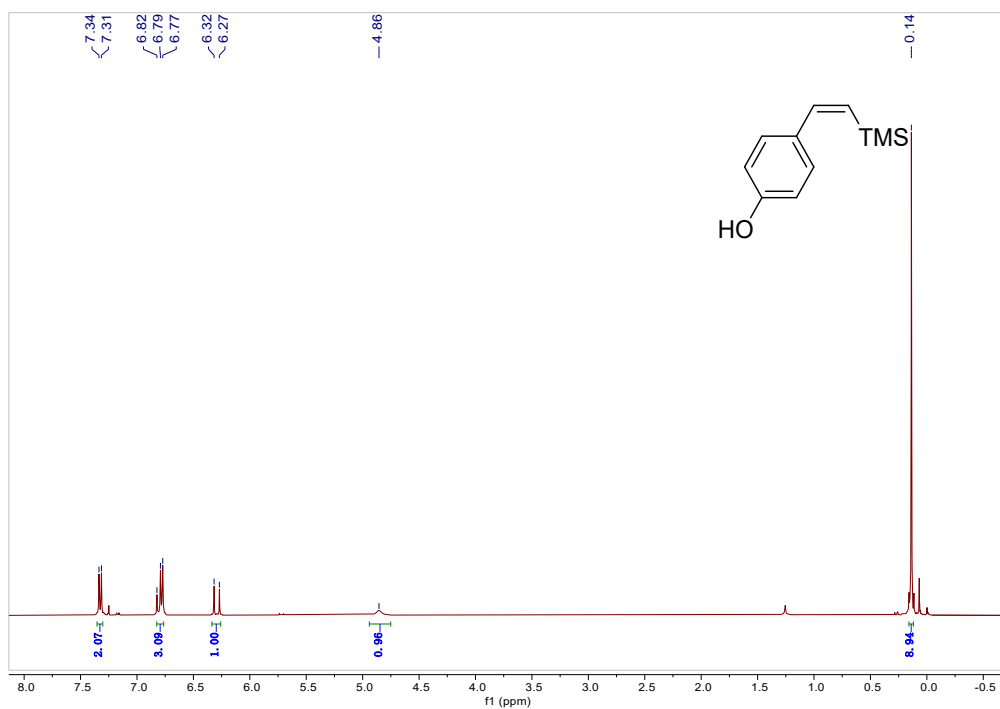

$^1\text{H}$  NMR for compound **2o**

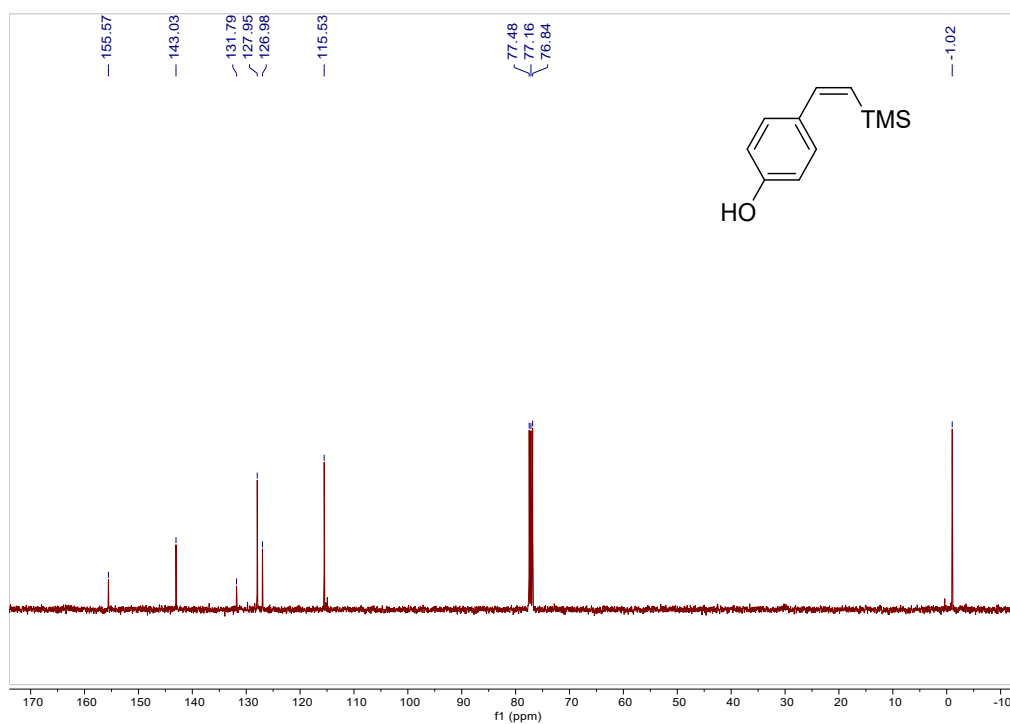

$^{13}\text{C}\{^1\text{H}\}$  NMR for compound **2o**

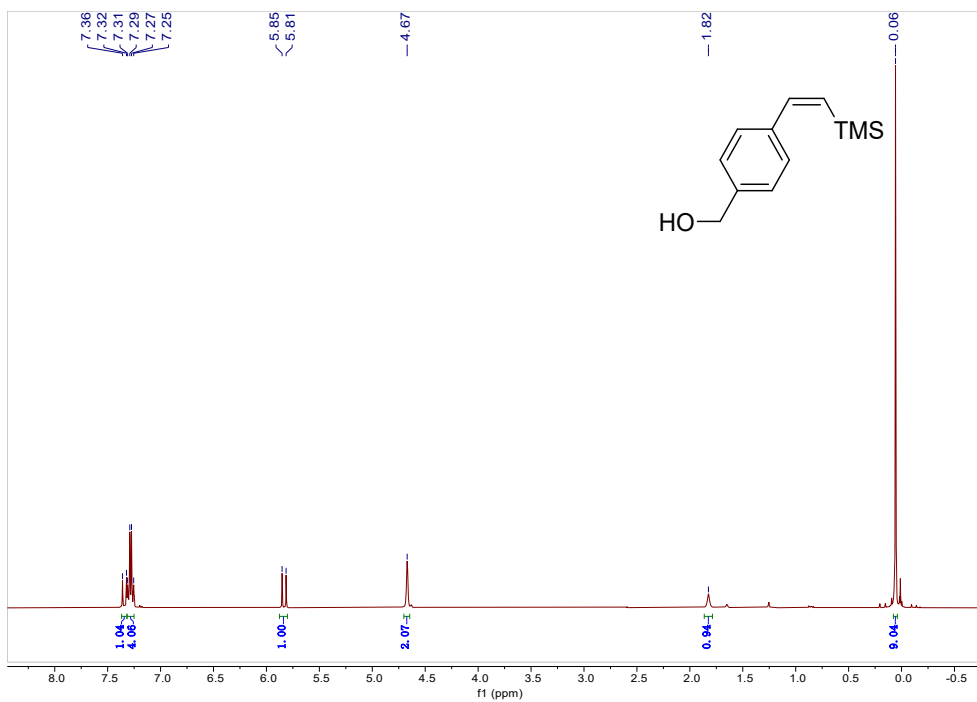

$^1\text{H}$  NMR for compound **2p**

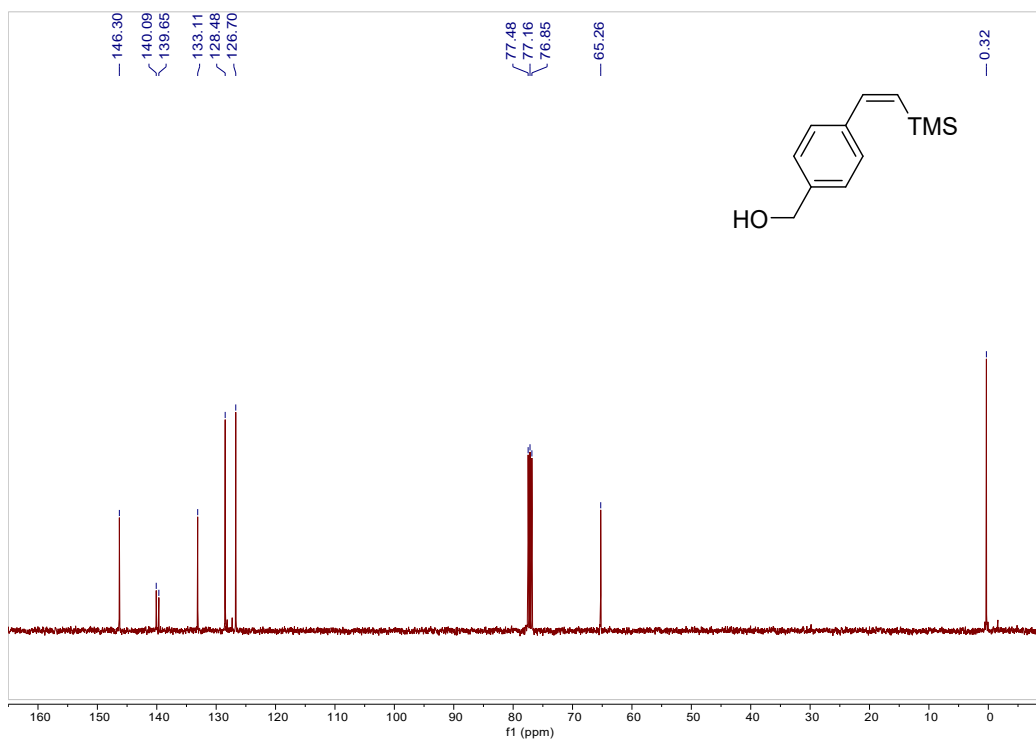

$^{13}\text{C}\{^1\text{H}\}$  NMR for compound **2p**



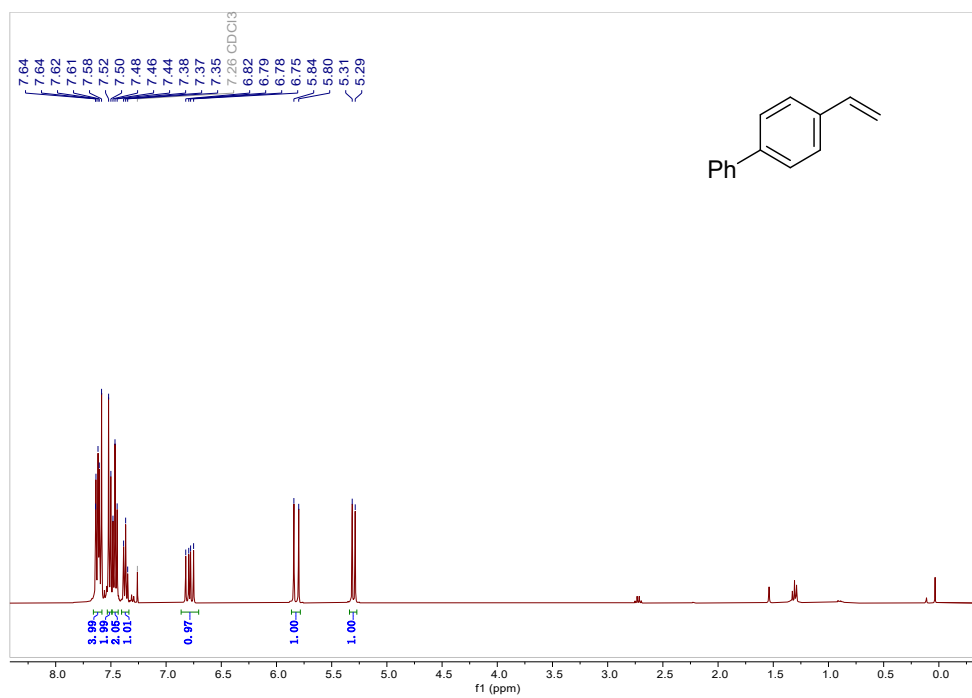

$^1\text{H}$  NMR for compound **2q**

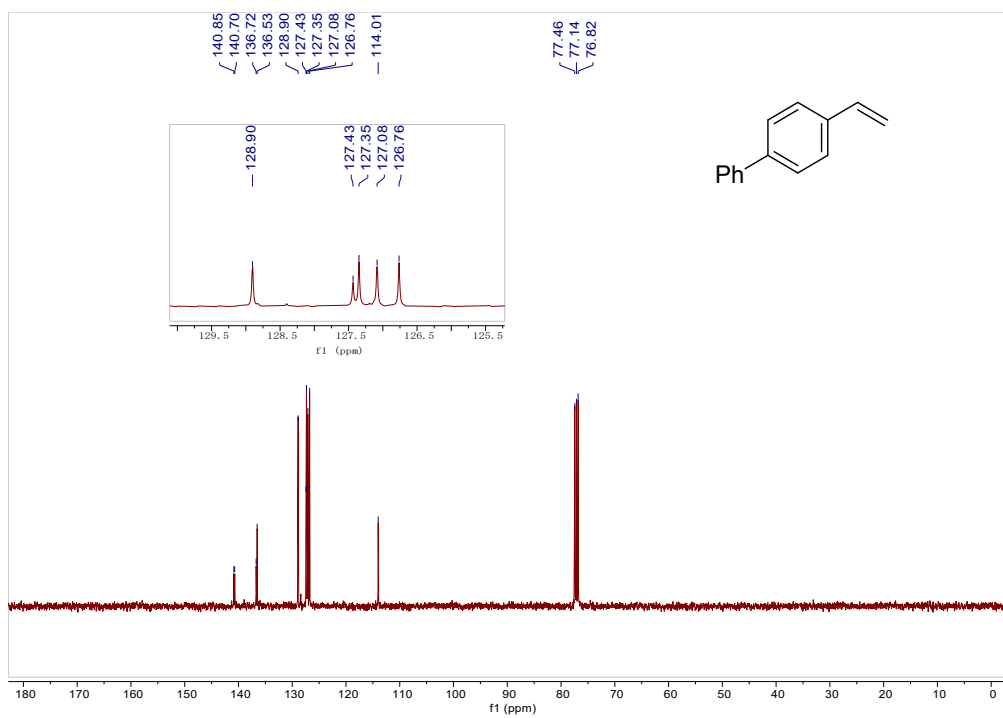

$^{13}\text{C}\{^1\text{H}\}$  NMR for compound **2q**

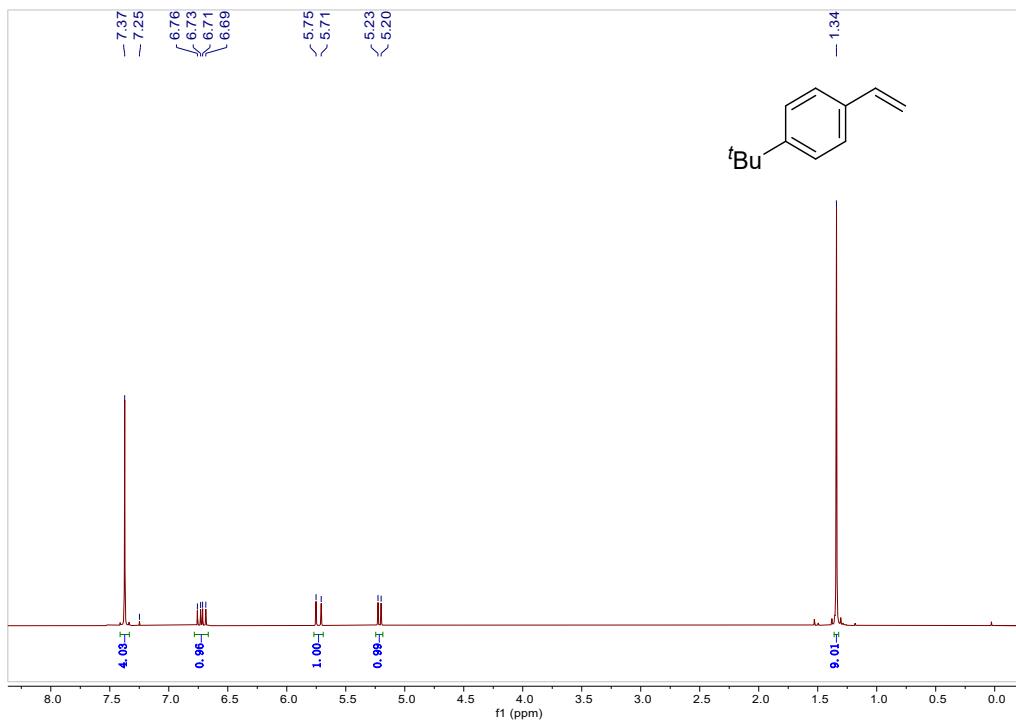

$^1\text{H}$  NMR for compound **2r**

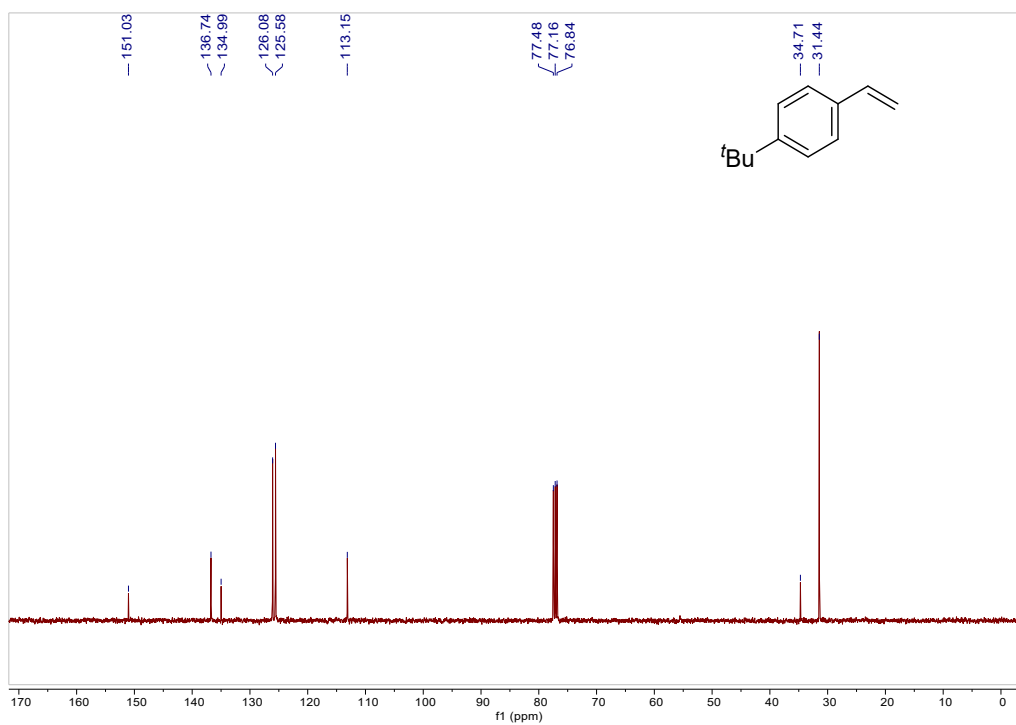

$^{13}\text{C}\{^1\text{H}\}$  NMR for compound **2r**

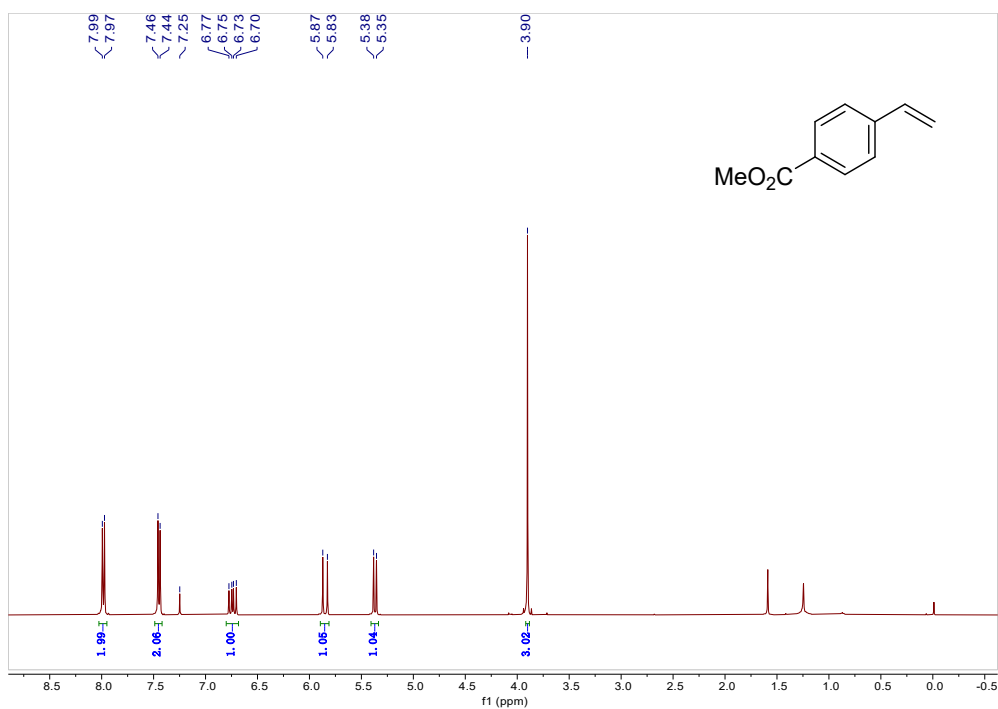

$^1\text{H}$  NMR for compound **2s**

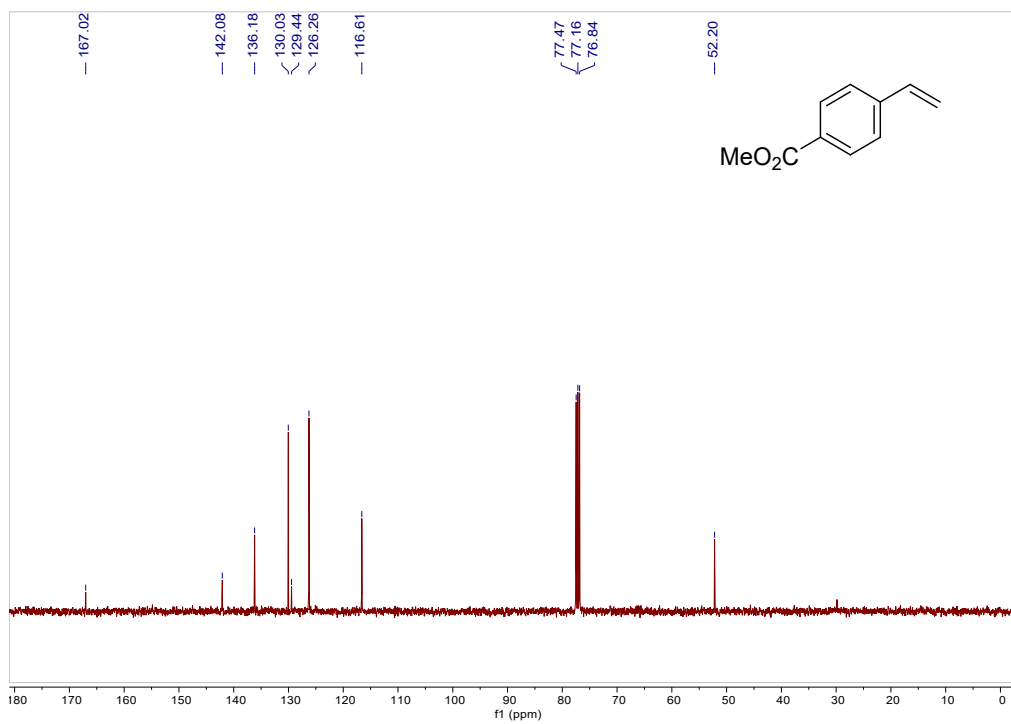

$^{13}\text{C}\{^1\text{H}\}$  NMR for compound **2s**
